# Supplementary material for: Neuronal identities derived by misexpression of the POU IV sensory determinant in a protovertebrate
Source: PubMed Central journal article supplement — Proc Natl Acad Sci U S A. 2022 Jan 18;119(4):e2118817119. doi: 10.1073/pnas.2118817119 (PMC8794889; doi:10.1073/pnas.2118817119), 2022-01-18
Supplement: pnas.2118817119.sapp.pdf [file pnas.2118817119.sapp.pdf]

# Supplementary Information Appendix

| <b>Cell Population</b>                        | <b>Marker Gene</b>        | <b>KHID (KH2012:KH.*)</b> |
|-----------------------------------------------|---------------------------|---------------------------|
| aATEN                                         | GnRH2                     | C9.484                    |
|                                               | GHSR                      | C1.315                    |
| BTN                                           | ASIC1b                    | C1.215                    |
|                                               | Synaphin                  | L164.21                   |
| PSC                                           | $\beta\gamma$ -Crystallin | S605.3                    |
|                                               | Sulfotransferase          | C9.423                    |
| Epidermis<br>(Control and PouIV-misexpressed) | FCL                       | C1.611                    |
|                                               | Unknown                   | C8.844                    |

**Table S1.** Gene names and matching KHIDs.

| <b>Gene</b>        | <b>KHID (KH2012:KH.*)</b> |
|--------------------|---------------------------|
| PouIV              | C2.42                     |
| Klf                | C5.154                    |
| Neurogenin (Ng)    | C6.129                    |
| $\beta$ -Thymosine | C2.140                    |

**Table S2.** Gene names and matching KHIDs for CESN ID

| OE Subcluster | aATEN  | BTN    | CESN   | PSC    | Number of Cells | Percentage of Total Number |
|---------------|--------|--------|--------|--------|-----------------|----------------------------|
| 1             | 0.0474 | 0.2693 | 0.0198 | 0.0860 | 387             | 24.6                       |
| 2             | 0.0601 | 0.4189 | 0.0805 | 0.0257 | 371             | 23.6                       |
| 3             | 0.0925 | 0.4196 | 0.1440 | 0.1005 | 367             | 23.4                       |
| 4             | 0.0577 | 0.4636 | 0.0169 | 0.0923 | 162             | 10.3                       |
| 5             | 0.0375 | 0.2382 | 0.1770 | 0.0175 | 136             | 8.66                       |
| 6             | 0.0200 | 0.1917 | 0.4324 | 0.0228 | 78              | 4.96                       |
| 7             | 0.0594 | 0.3754 | 0.0280 | 0.2097 | 69              | 4.39                       |

**Table S3.** Average of Cell-Type Specific Solved Coefficients for all cells in each subcluster population. Number of cells belonging to each subcluster and percentage of total cells is also given. Subcluster histograms are shown below table for visual aid.

**Table S4. Primer Sequences**

| <b>Gene Name</b> | <b>Construct name</b>           | <b>Forward primer</b>           | <b>Reverse Primer</b>              |
|------------------|---------------------------------|---------------------------------|------------------------------------|
| POU IV           | pSPCiPOU IVcDNA                 | aagcggccgctatgtttactaacatgct    | ctacataatcacgtccccattaa            |
| CesA             | pSPCesAPOUIVcDNA                | atgcggatcctcgcgggcgaagtaaagcgag | gatcggatcctgtcagaccaggt<br>gttca   |
| neurogenin       | pSPneurogenin-1675/-1426fog220K | gatcctcgagccattactccgcaatgcgcg  | gatcggatccaaattacccaaaa<br>tttgtcc |
| Foxg             | pSPFoxg500bpK                   | gatcctcgagaatccgtagagtgacaa     | gatcgcggccgcctgtatgccgc<br>gtttctc |

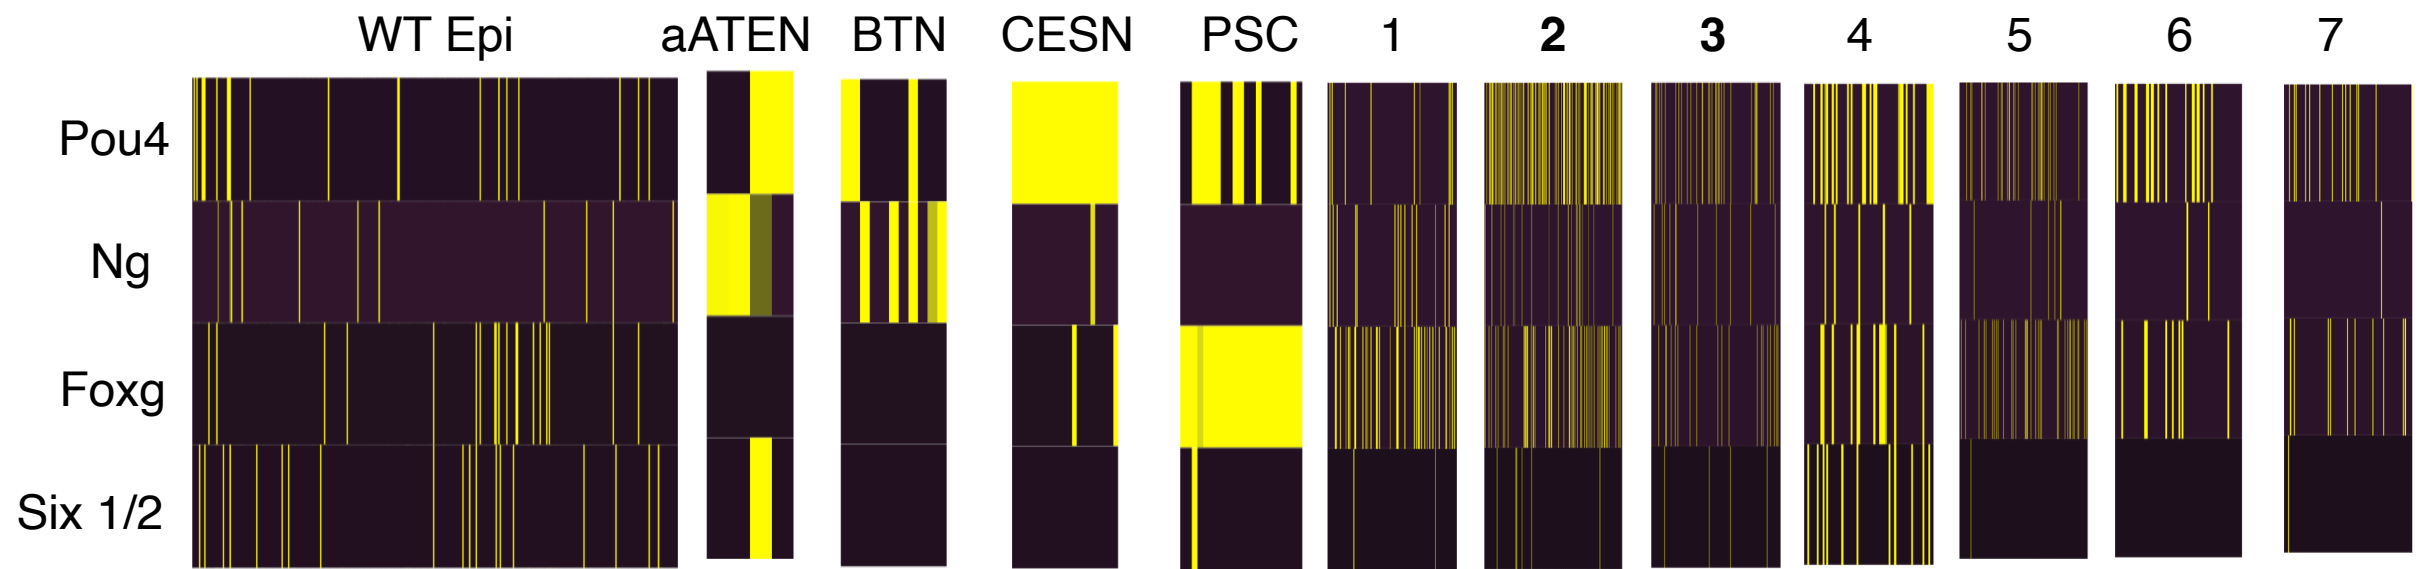

**Fig. S1.** Expression of Key Transcription Factors in WT Cell types and OE Clusters.

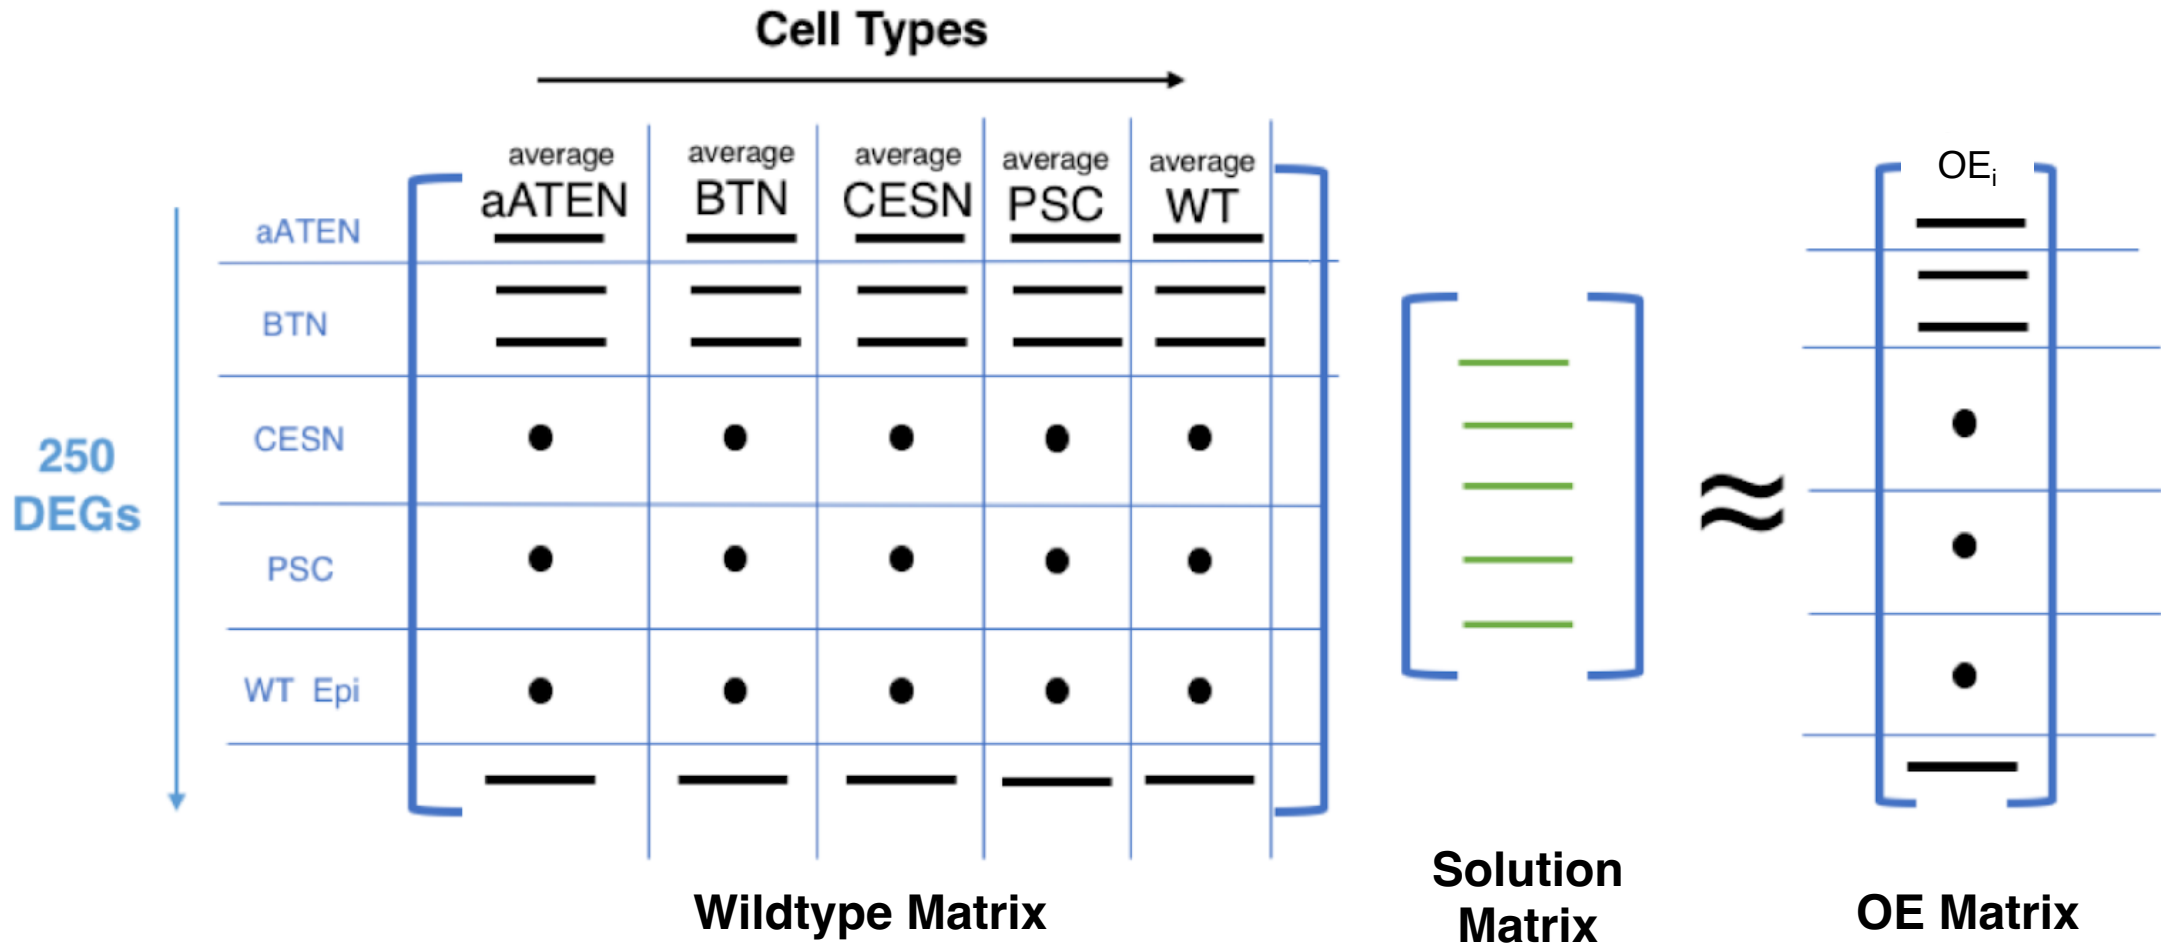

**Fig. S2.** Schematic of Linear Model. Each green entry in the Solution Matrix is a “Cell-type Specific Solved Coefficient”

1

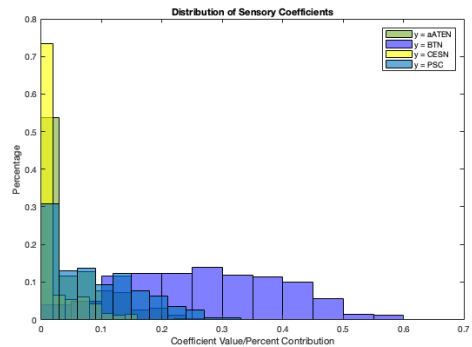

2

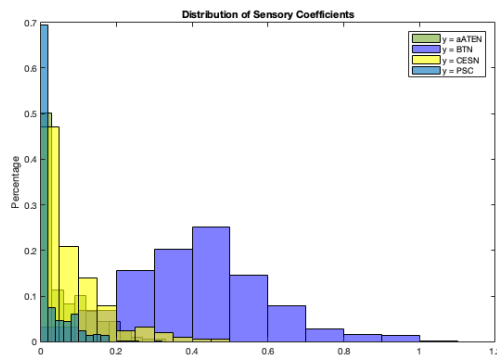

3

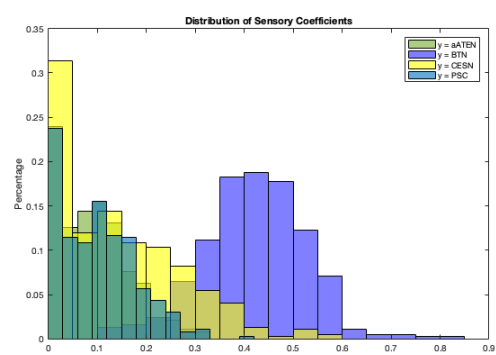

4

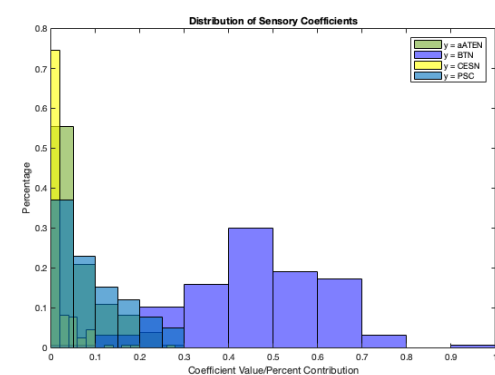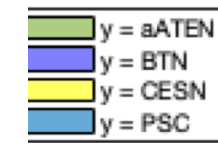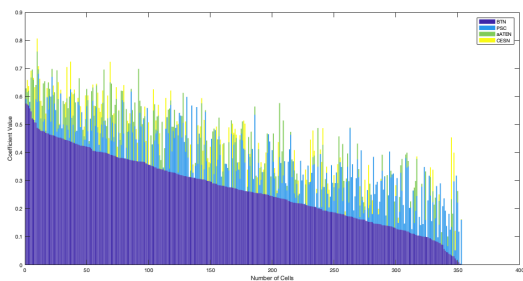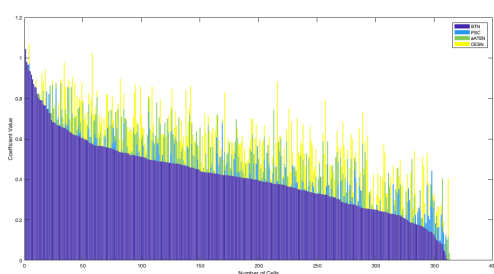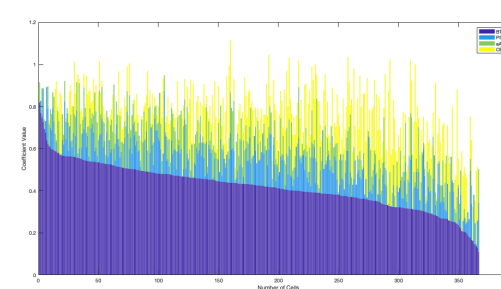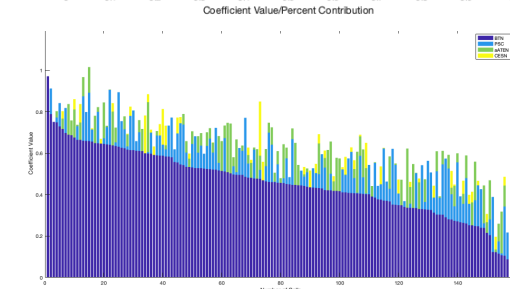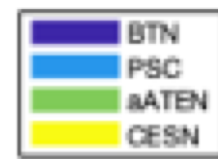

**Fig. S3a.** Visualization of Solved Coefficients for all cells (histogram, top) and Solved coefficients for single cells (stacked barplot, bottom) in subclusters 1-4. For the histograms, X-axis is coefficient value, Y-axis is the percentage of cells. For the stacked barplots, X-axis is a single cell, Y-axis is value of coefficient. Coefficients have bounds [0, 1].



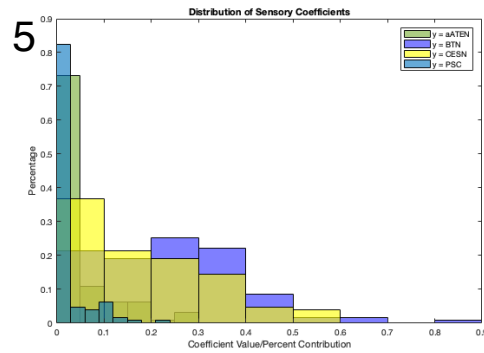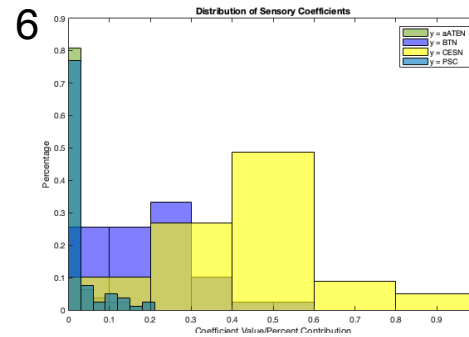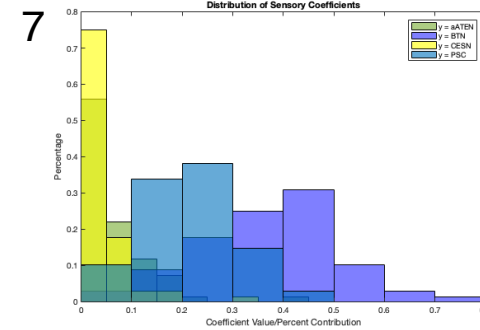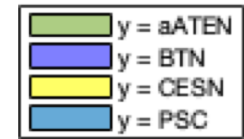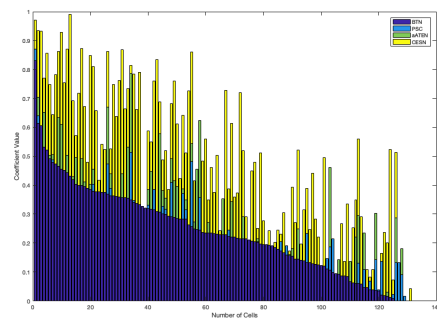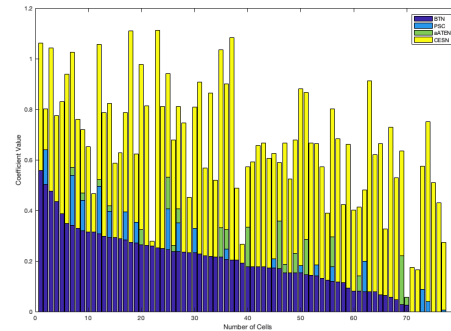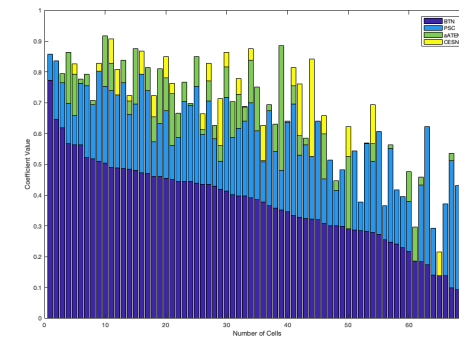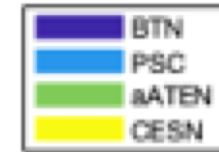

**Fig. S3b.** Visualization of Solved Coefficients for all cells (histogram, top) and Solved coefficients for single cells (stacked barplot, bottom) in subclusters 5-7. For the histograms, X-axis is coefficient value, Y-axis is the percentage of cells. For the stacked barplots, X-axis is a single cell, Y-axis is value of coefficient. Coefficients have bounds [0, 1].

| OE Subcluster | aATEN  | BTN    | CESN   | PSC    | Number of Cells | Percentage of Total Number |
|---------------|--------|--------|--------|--------|-----------------|----------------------------|
| 1             | 0.0474 | 0.2693 | 0.0198 | 0.0860 | 387             | 24.6                       |
| 2             | 0.0601 | 0.4189 | 0.0805 | 0.0257 | 371             | 23.6                       |
| 3             | 0.0925 | 0.4196 | 0.1440 | 0.1005 | 367             | 23.4                       |
| 4             | 0.0577 | 0.4636 | 0.0169 | 0.0923 | 162             | 10.3                       |
| 5             | 0.0375 | 0.2382 | 0.1770 | 0.0175 | 136             | 8.66                       |
| 6             | 0.0200 | 0.1917 | 0.4324 | 0.0228 | 78              | 4.96                       |
| 7             | 0.0594 | 0.3754 | 0.0280 | 0.2097 | 69              | 4.39                       |

1

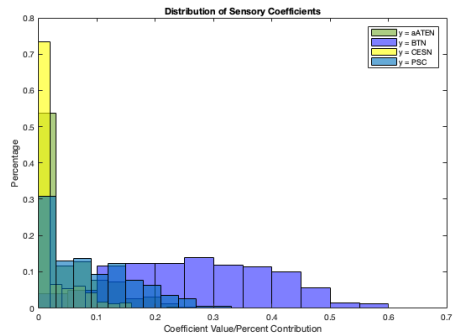

2

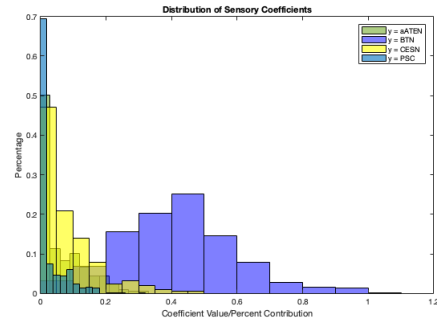

3

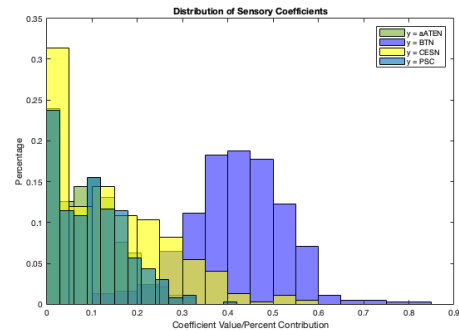

4

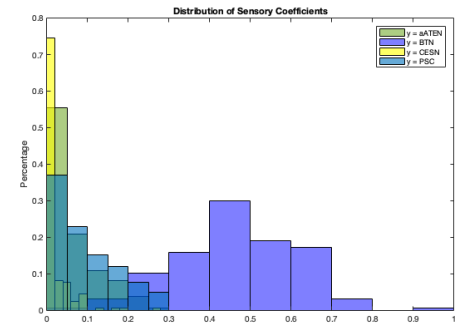

5

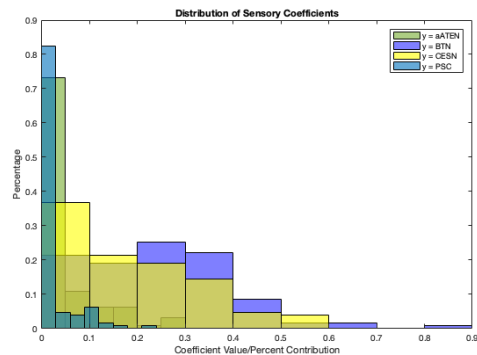

6

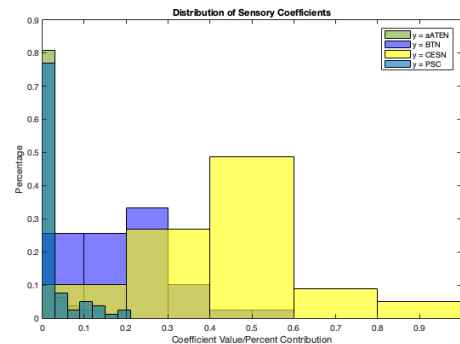

7

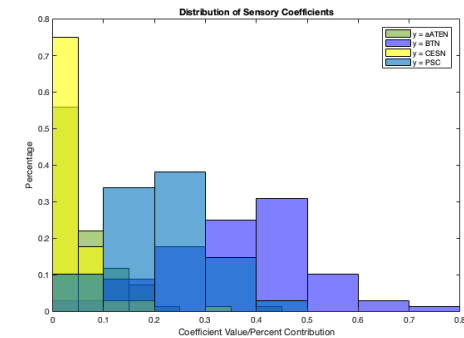

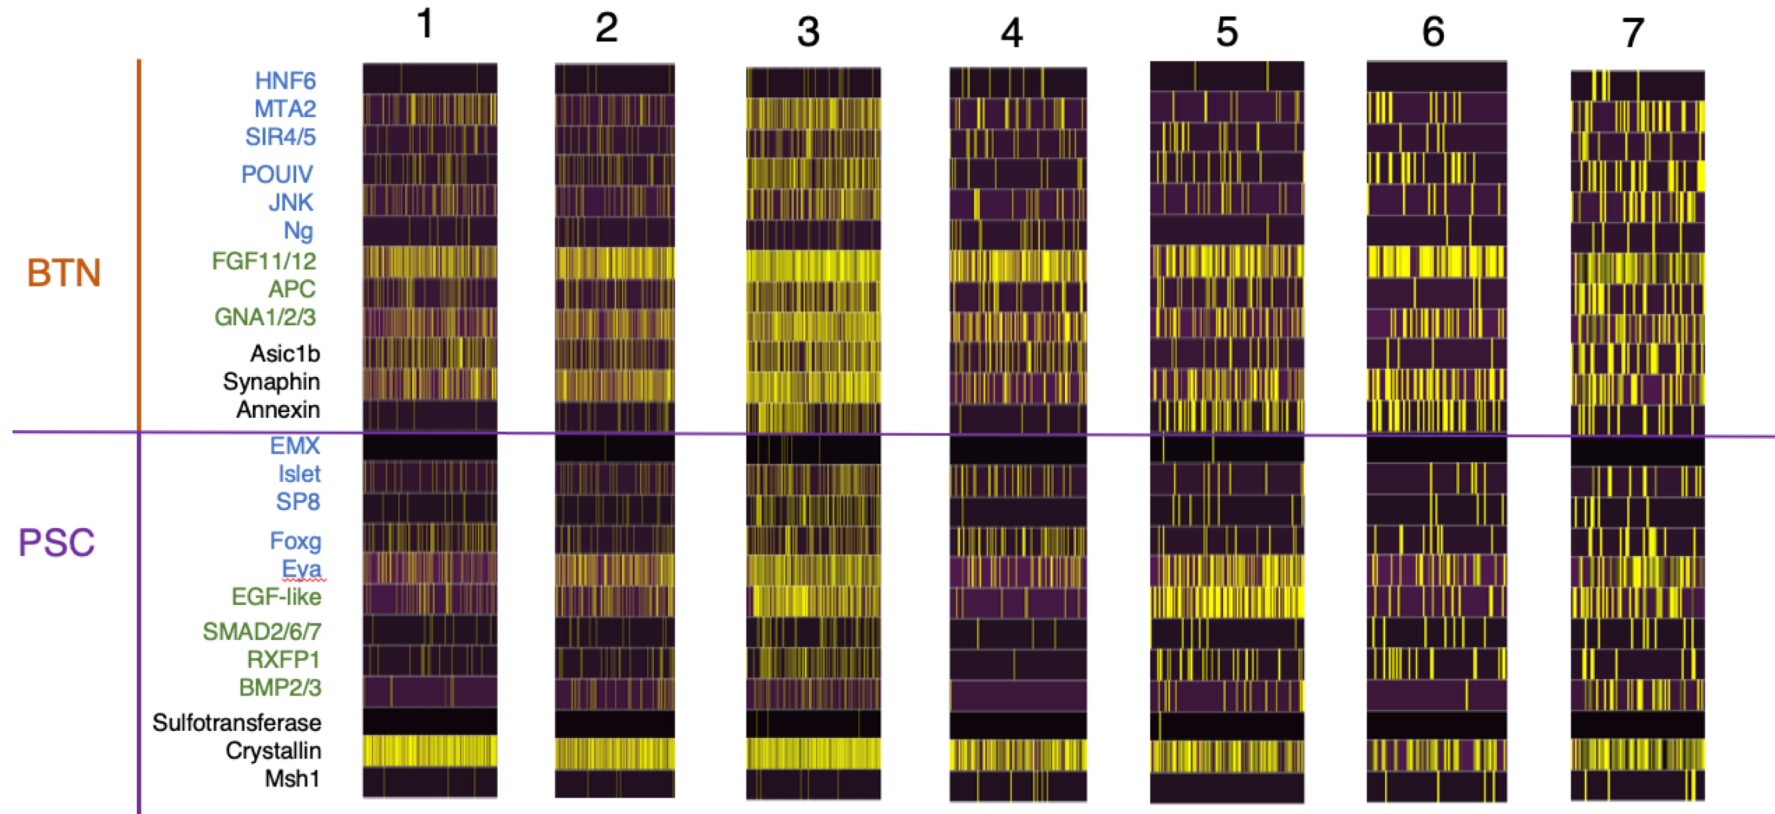

**Fig. S4. Expression Levels of Various BTN and PSC Markers among Cells in OE Subclusters, Wildtype BTNs, and Wildtype PSCs.** The above heatmap visualizes expression levels of various BTN and PSC transcription factor (blue), signaling molecule (green), and effector (black) genes.

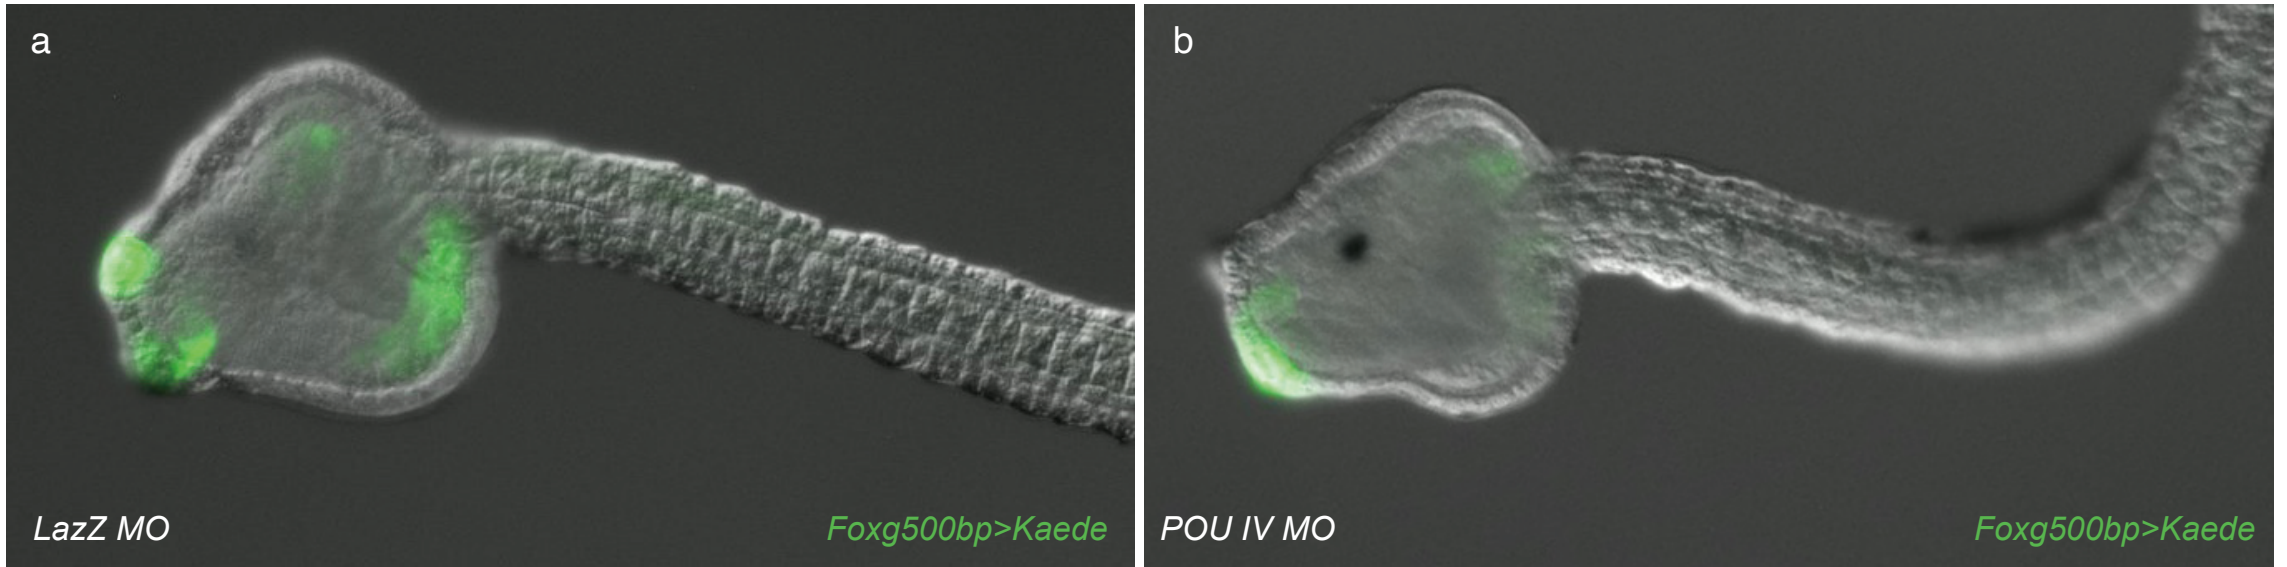

**Fig. S5. Expression of Foxg is diminished in larvae injected with POU IV morpholino.** (a) Kaede fluorescence in *Foxg>Kaede* injected larva (b) Foxg expression is diminished in PSCs upon loss of POU IV expression.

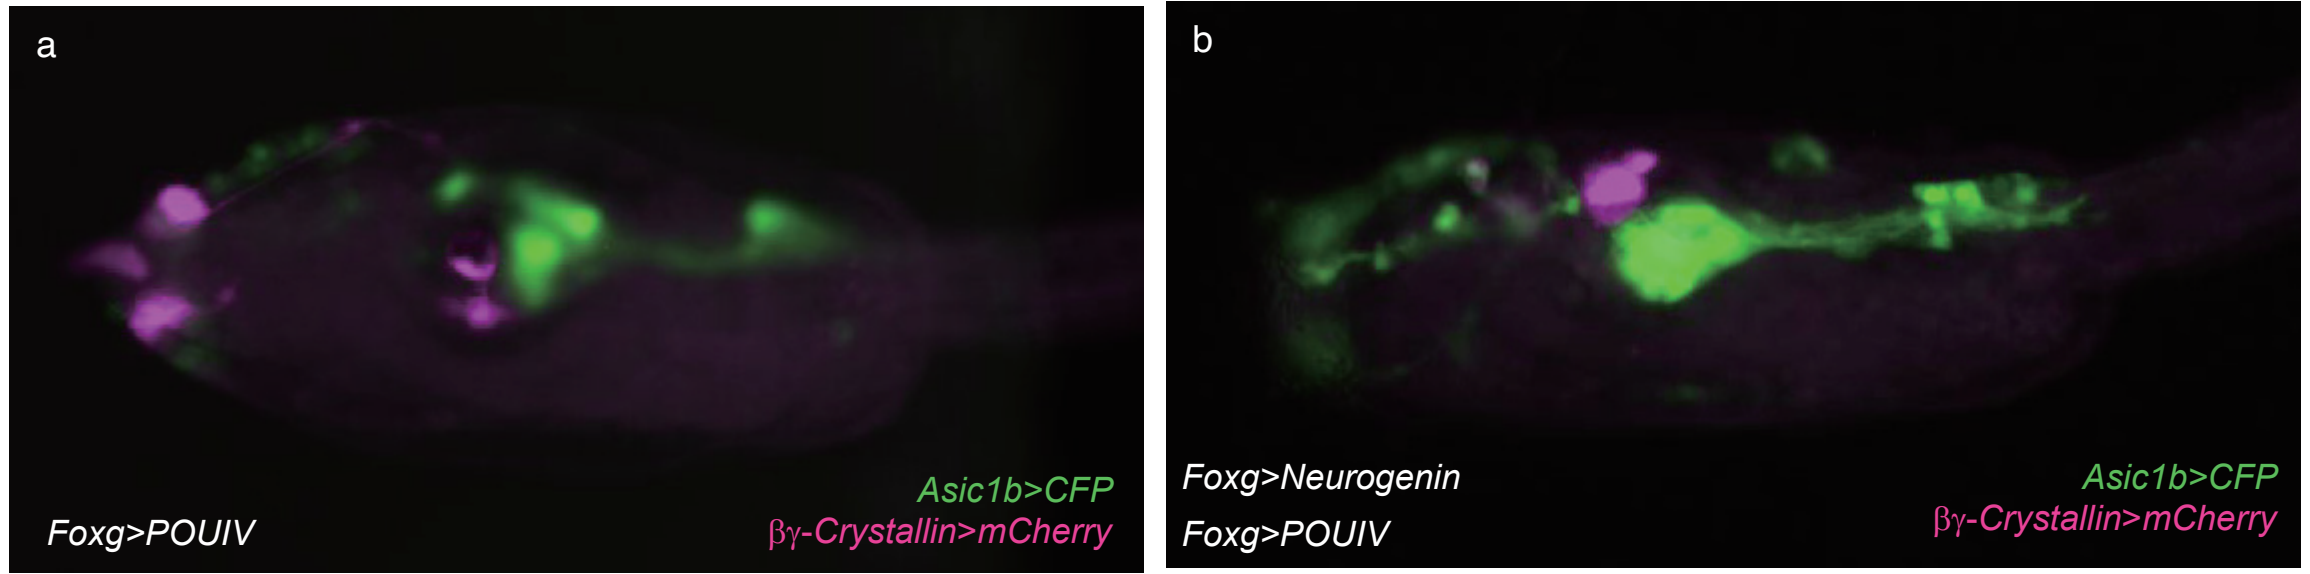

**Fig. S6. Misexpression of POUIV and Neurogenin induces more complete transformation of PSCs to BTNs.**

**(a)** *Foxg>POU IV*, like *Foxg>Neurogenin* (Fig. 4 g-h) induces the expression of *Asic1b* in PSCs and  $\beta\gamma$ -Crystallin expression is maintained, demonstrating the hybrid phenotype.

**(b)** *Foxg>POUIV+Neurogenin* injected larva express *Asic1b* and lose the expression of  $\beta\gamma$ -Crystallin.

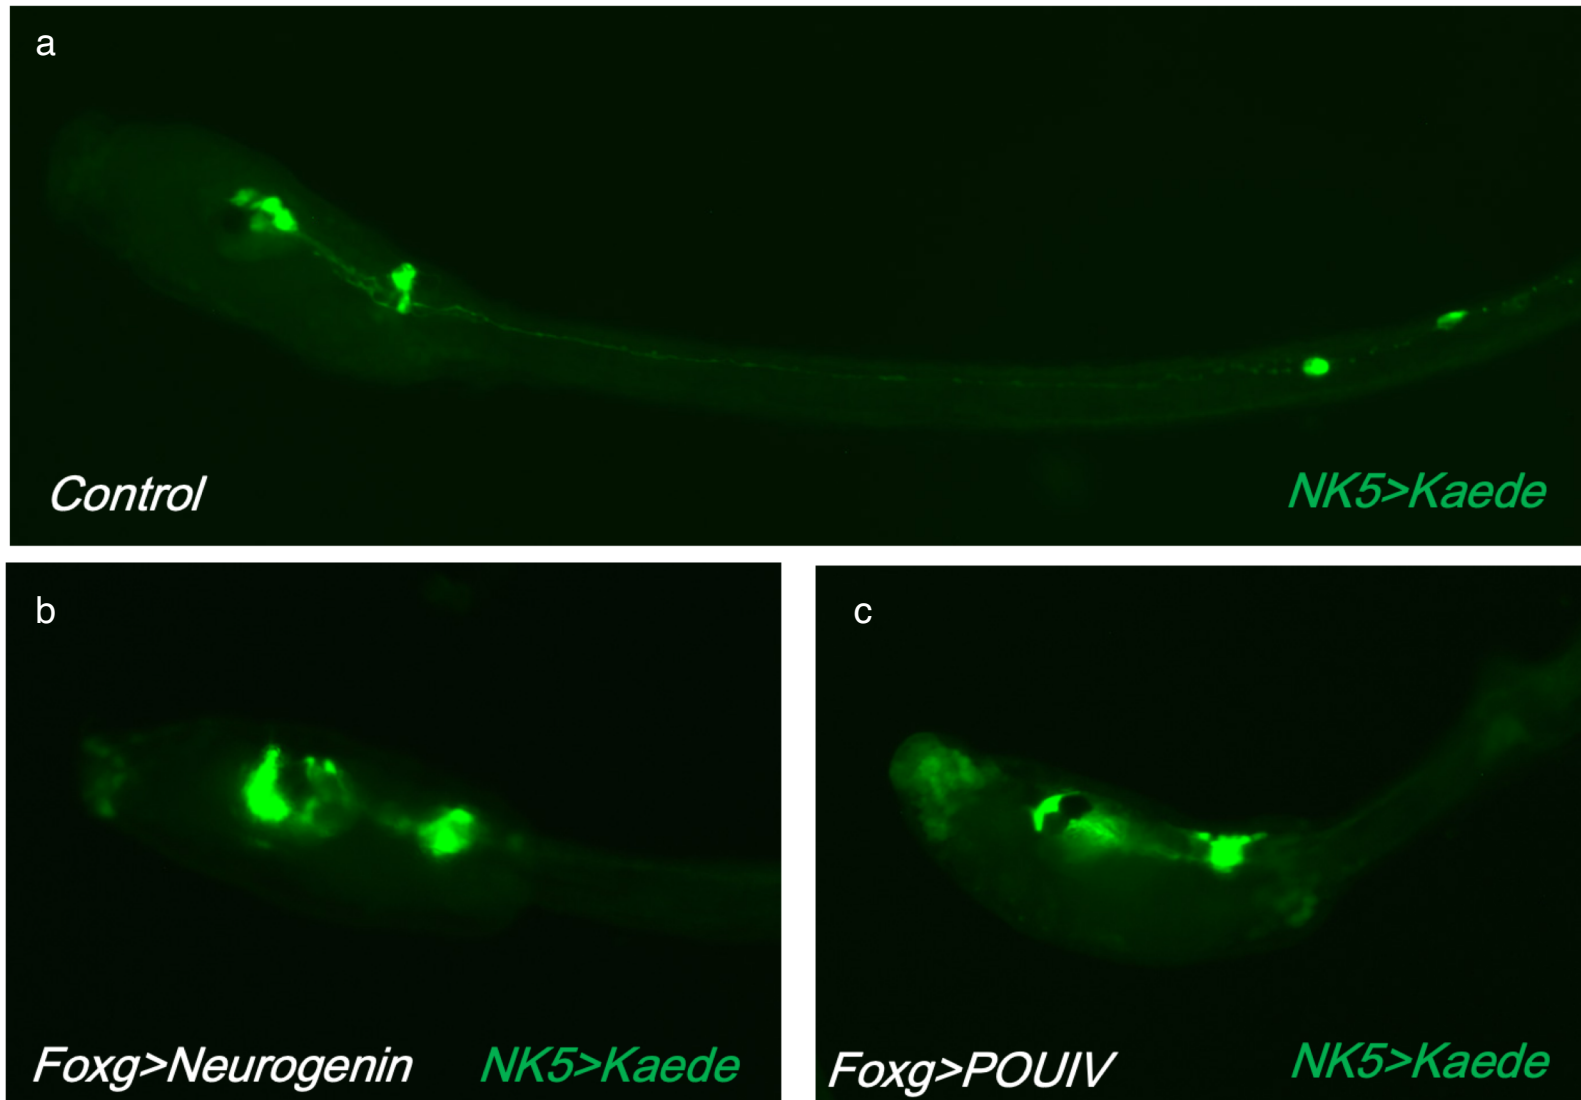

**Fig. S7. Misexpression of POU IV and Neurogenin in PSCs induce the expression of NK5 in PSCs.** (a) Kaede fluorescence in *NK5>Kaede* injected larva. (b) Kaede fluorescence in *Foxg>Neurogenin* and *NK5>Kaede* injected larva. (c) Kaede fluorescence in *Foxg>POUIV* and *NK5>Kaede* injected larva. Misexpression of POU IV and Neurogenin in PSCs induce the expression of NK5, another BTN marker, in PSCs.

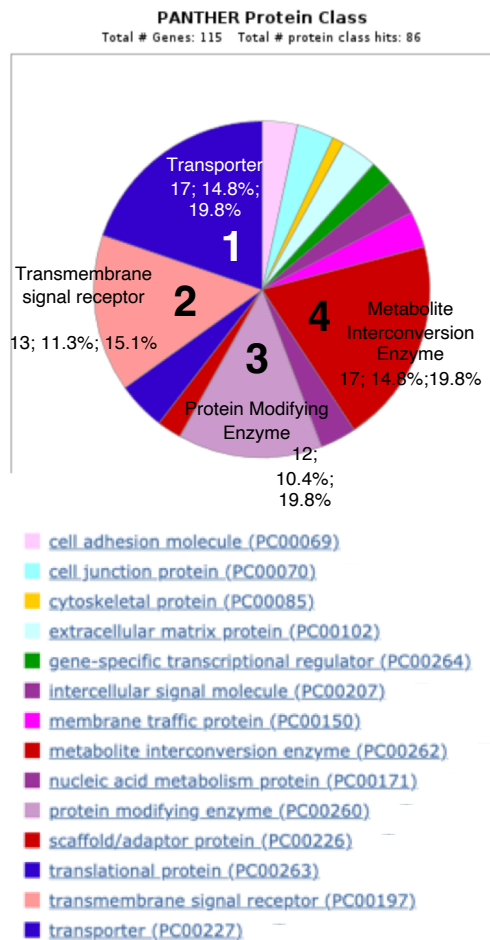

1

|          |                                                                                             |
|----------|---------------------------------------------------------------------------------------------|
| SLC22A4  | Solute carrier family 22 member 4<br><a href="#">SLC22A4</a><br>ortholog                    |
| SLC22A16 | Solute carrier family 22 member 16<br><a href="#">SLC22A16</a><br>ortholog                  |
| SLC44A1  | Choline transporter-like protein 1<br><a href="#">SLC44A1</a><br>ortholog                   |
| SLC22A15 | Solute carrier family 22 member 15<br><a href="#">SLC22A15</a><br>ortholog                  |
| SLC24A3  | Sodium/potassium/calcium exchanger 3<br><a href="#">SLC24A3</a><br>ortholog                 |
| SLC25A11 | Mitochondrial 2-oxoglutarate/malate carrier protein<br><a href="#">SLC25A11</a><br>ortholog |
| SLC25A10 | Mitochondrial dicarboxylate carrier<br><a href="#">SLC25A10</a><br>ortholog                 |
| SLC44A3  | Choline transporter-like protein 3<br><a href="#">SLC44A3</a><br>ortholog                   |
| SLC44A5  | Choline transporter-like protein 5<br><a href="#">SLC44A5</a><br>ortholog                   |
| SLC24A4  | Sodium/potassium/calcium exchanger 4<br><a href="#">SLC24A4</a><br>ortholog                 |
| SLC27A2  | Very long-chain acyl-CoA synthetase<br><a href="#">SLC27A2</a><br>ortholog                  |
| SLC27A6  | Long-chain fatty acid transport protein 6<br><a href="#">SLC27A6</a><br>ortholog            |
| SLC24A2  | Sodium/potassium/calcium exchanger 2<br><a href="#">SLC24A2</a><br>ortholog                 |
| SLC27A3  | Solute carrier family 27 member 3<br><a href="#">SLC27A3</a><br>ortholog                    |

2

|        |                                                                                 |
|--------|---------------------------------------------------------------------------------|
| ADRA1A | Alpha-1A adrenergic receptor<br><a href="#">ADRA1A</a><br>ortholog              |
| NTSR1  | Neurotensin receptor type 1<br><a href="#">NTSR1</a><br>ortholog                |
| DRD2   | D(2) dopamine receptor<br><a href="#">DRD2</a><br>ortholog                      |
| ADRA1A | Alpha-1D adrenergic receptor<br><a href="#">ADRA1D</a><br>ortholog              |
| ADGRG6 | Adhesion G-protein coupled receptor G6<br><a href="#">ADGRG6</a><br>ortholog    |
| ADRA2B | Alpha-2B adrenergic receptor<br><a href="#">ADRA2B</a><br>ortholog              |
| GHSR   | Growth hormone secretagogue receptor type 1<br><a href="#">GHSR</a><br>ortholog |
| ADGRL3 | Adhesion G-protein-coupled receptor L3<br><a href="#">ADGRL3</a><br>ortholog    |
| ADRA2A | Alpha-2A adrenergic receptor<br><a href="#">ADRA2A</a><br>ortholog              |
| ADGRG4 | Adhesion G-protein coupled receptor G4<br><a href="#">ADGRG4</a><br>ortholog    |

3

|        |                                                                                        |
|--------|----------------------------------------------------------------------------------------|
| UQCRC1 | Cytochrome b-c1 complex subunit 1, mitochondrial<br><a href="#">UQCRC1</a><br>ortholog |
| CPVL   | Probable serine carboxypeptidase<br><a href="#">CPVL</a><br>ortholog                   |
| HTRA1  | Serine protease<br><a href="#">HTRA1</a><br>ortholog                                   |
| CTSA   | Lysosomal protective protein<br><a href="#">CTSA</a><br>ortholog                       |
| CPN1   | Carboxypeptidase N catalytic chain<br><a href="#">CPN1</a><br>ortholog                 |
| HTRA4  | Serine protease<br><a href="#">HTRA4</a><br>ortholog                                   |
| IDE    | Insulin-degrading enzyme<br><a href="#">IDE</a><br>ortholog                            |
| NRDC   | Nardilysin<br><a href="#">NRDC</a><br>ortholog                                         |
| CPE    | Carboxypeptidase E<br><a href="#">CPE</a><br>ortholog                                  |
| SCPEP1 | Retinoid-inducible serine carboxypeptidase<br><a href="#">SCPEP1</a><br>ortholog       |
| CPD    | Carboxypeptidase D<br><a href="#">CPD</a><br>ortholog                                  |
| HTRA3  | Serine protease<br><a href="#">HTRA3</a><br>ortholog                                   |

4

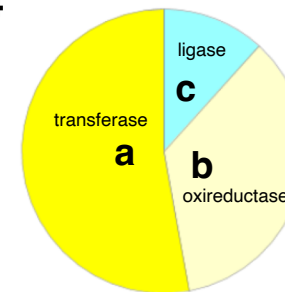

a transferase

|         |                                                                                                 |
|---------|-------------------------------------------------------------------------------------------------|
| PFKP    | ATP-dependent 6-phosphofructokinase, platelet type<br><a href="#">PFKP</a><br>ortholog          |
| UCKL1   | Uridine-cytidine kinase-like 1<br><a href="#">UCKL1</a><br>ortholog                             |
| PIPSK1B | Phosphatidylinositol 4-phosphate 5-kinase type-1 beta<br><a href="#">PIPSK1B</a><br>ortholog    |
| PFKM    | ATP-dependent 6-phosphofructokinase, muscle type<br><a href="#">PFKM</a><br>ortholog            |
| CASD1   | N-acetylneuraminate 9-O-acetyltransferase<br><a href="#">CASD1</a><br>ortholog                  |
| PIPSK1A | Phosphatidylinositol 4-phosphate 5-kinase type-1 alpha<br><a href="#">PIPSK1A</a><br>ortholog   |
| UPRT    | Uracil phosphoribosyltransferase homology<br><a href="#">UPRT</a><br>ortholog                   |
| PIPSKL1 | Phosphatidylinositol 4-phosphate 5-kinase-like protein 1<br><a href="#">PIPSKL1</a><br>ortholog |
| PFKL    | ATP-dependent 6-phosphofructokinase, liver type<br><a href="#">PFKL</a><br>ortholog             |

c ligase

|       |                                                                      |
|-------|----------------------------------------------------------------------|
| CTPS2 | CTP synthase 2<br><a href="#">CTPS2</a><br>ortholog                  |
| CTPS1 | CTP synthase 1<br><a href="#">CTPS1</a><br>ortholog                  |
| MOXD1 | DBH-like monoxygenase protein 1<br><a href="#">MOXD1</a><br>ortholog |
| DBH   | Dopamine beta-hydroxylase<br><a href="#">DBH</a><br>ortholog         |

b oxireductase

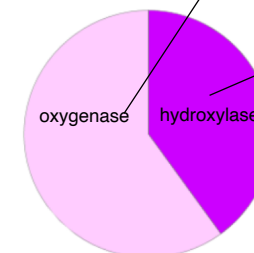

|      |                                                                                      |
|------|--------------------------------------------------------------------------------------|
| FMO2 | Dimethylaniline monoxygenase [N-oxide-forming] 2<br><a href="#">FMO2</a><br>ortholog |
| FMO2 | Dimethylaniline monoxygenase [N-oxide-forming] 4<br><a href="#">FMO4</a><br>ortholog |
| FMO5 | Flavin-containing monoxygenase 5<br><a href="#">FMO5</a><br>ortholog                 |

**Fig. S8. PANTHER Protein Class classification of human orthologs of OE DEGs.**

# genes; Percent of gene hit against total # genes; Percent of gene hit against total # Protein Class hits

### PANTHER GO-Slim Biological Process

Total # Genes: 115 Total # process hits: 208

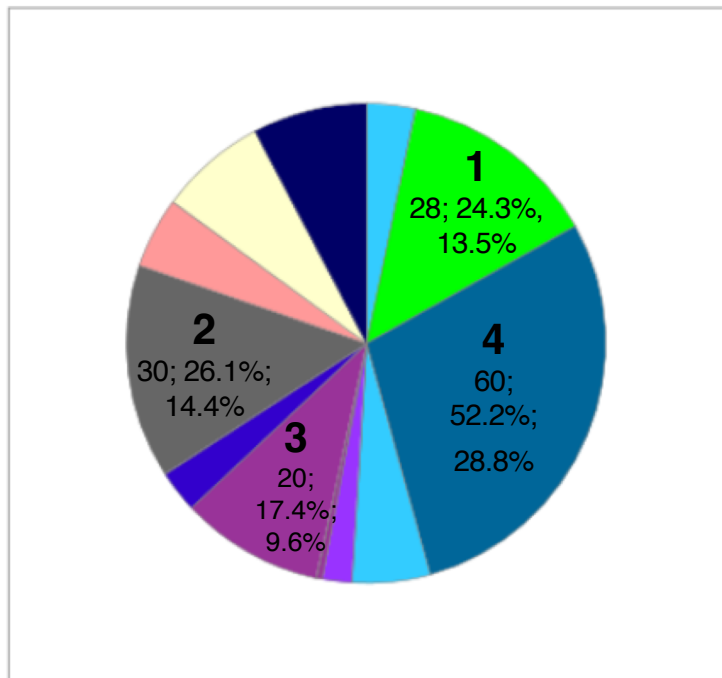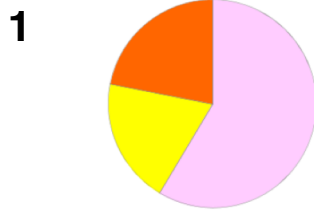

- regulation of biological process (GO:0050789)
- regulation of biological quality (GO:0065008)
- regulation of molecular function (GO:0065009)

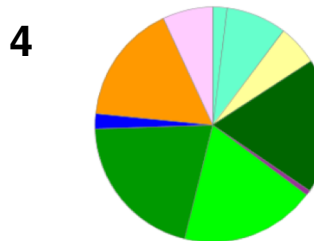

- ATP metabolic process (GO:0046034)
- biosynthetic process (GO:0009058)
- catabolic process (GO:0009056)
- cellular metabolic process (GO:0044237)
- methylation (GO:0032259)
- nitrogen compound metabolic process (GO:0006807)
- organic substance metabolic process (GO:0071704)
- oxidation-reduction process (GO:0055114)
- primary metabolic process (GO:0044238)
- small molecule metabolic process (GO:0044281)

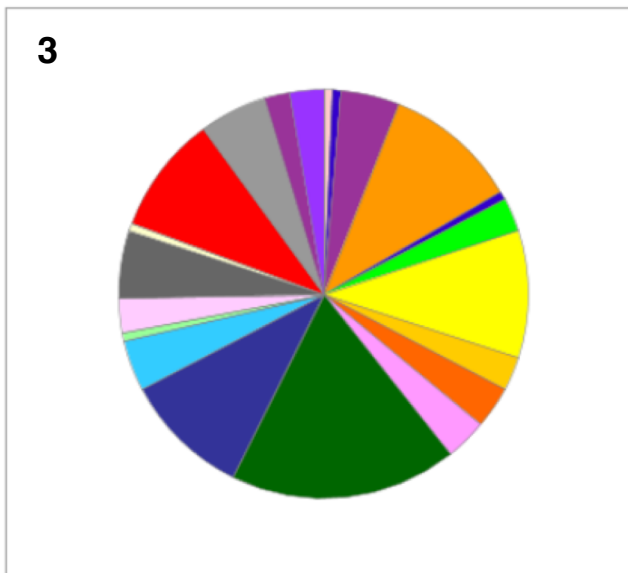

- actin filament-based process (GO:0030029)
- cell activation (GO:0001775)
- cell adhesion (GO:0007155)
- cell communication (GO:0007154)
- cell death (GO:0008219)
- cell population proliferation (GO:0008283)
- cellular component organization or biogenesis (GO:0071840)
- cellular developmental process (GO:0048869)
- cellular homeostasis (GO:0019725)
- cellular localization (GO:0051641)
- cellular metabolic process (GO:0044237)
- cellular response to stimulus (GO:0051716)
- localization of cell (GO:0051674)
- maintenance of location in cell (GO:0051651)
- microtubule-based process (GO:0007017)
- movement of cell or subcellular component (GO:0006928)
- myelination (GO:0042552)
- signal transduction (GO:000716)
- transmembrane transport (GO:0055085)
- vesicle targeting (GO:0006903)
- vesicle-mediated transport (GO:0016192)

\*\*Chart tooltips are read as: Category name (Accession): # genes; Percent of gene hit against total # genes; Percent of gene hit against total # Process hits

- biological adhesion (GO:0022610)
- biological regulation (GO:0065007)
- cellular process (GO:0009987)
- developmental process (GO:0032502)
- immune system process (GO:0002376)
- interspecies interaction between organisms (GO:0044419)
- localization (GO:0051179)
- locomotion (GO:0040011)
- metabolic process (GO:0008152)
- multicellular organismal process (GO:0032501)
- response to stimulus (GO:0050896)
- signaling (GO:0023052)

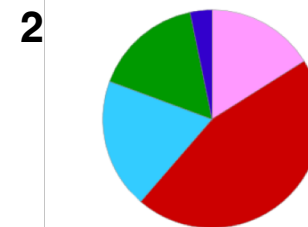

- cellular localization (GO:0051641)
- establishment of localization (GO:0051234)
- localization of cell (GO:0051674)
- macromolecule localization (GO:0033036)
- maintenance of location (GO:0051235)

**Fig. S9. PANTHER Biological Process classification of human orthologs of OE DEGs.**  
# genes; Percent of gene hit against total # genes; Percent of gene hit against total # Protein Class hits



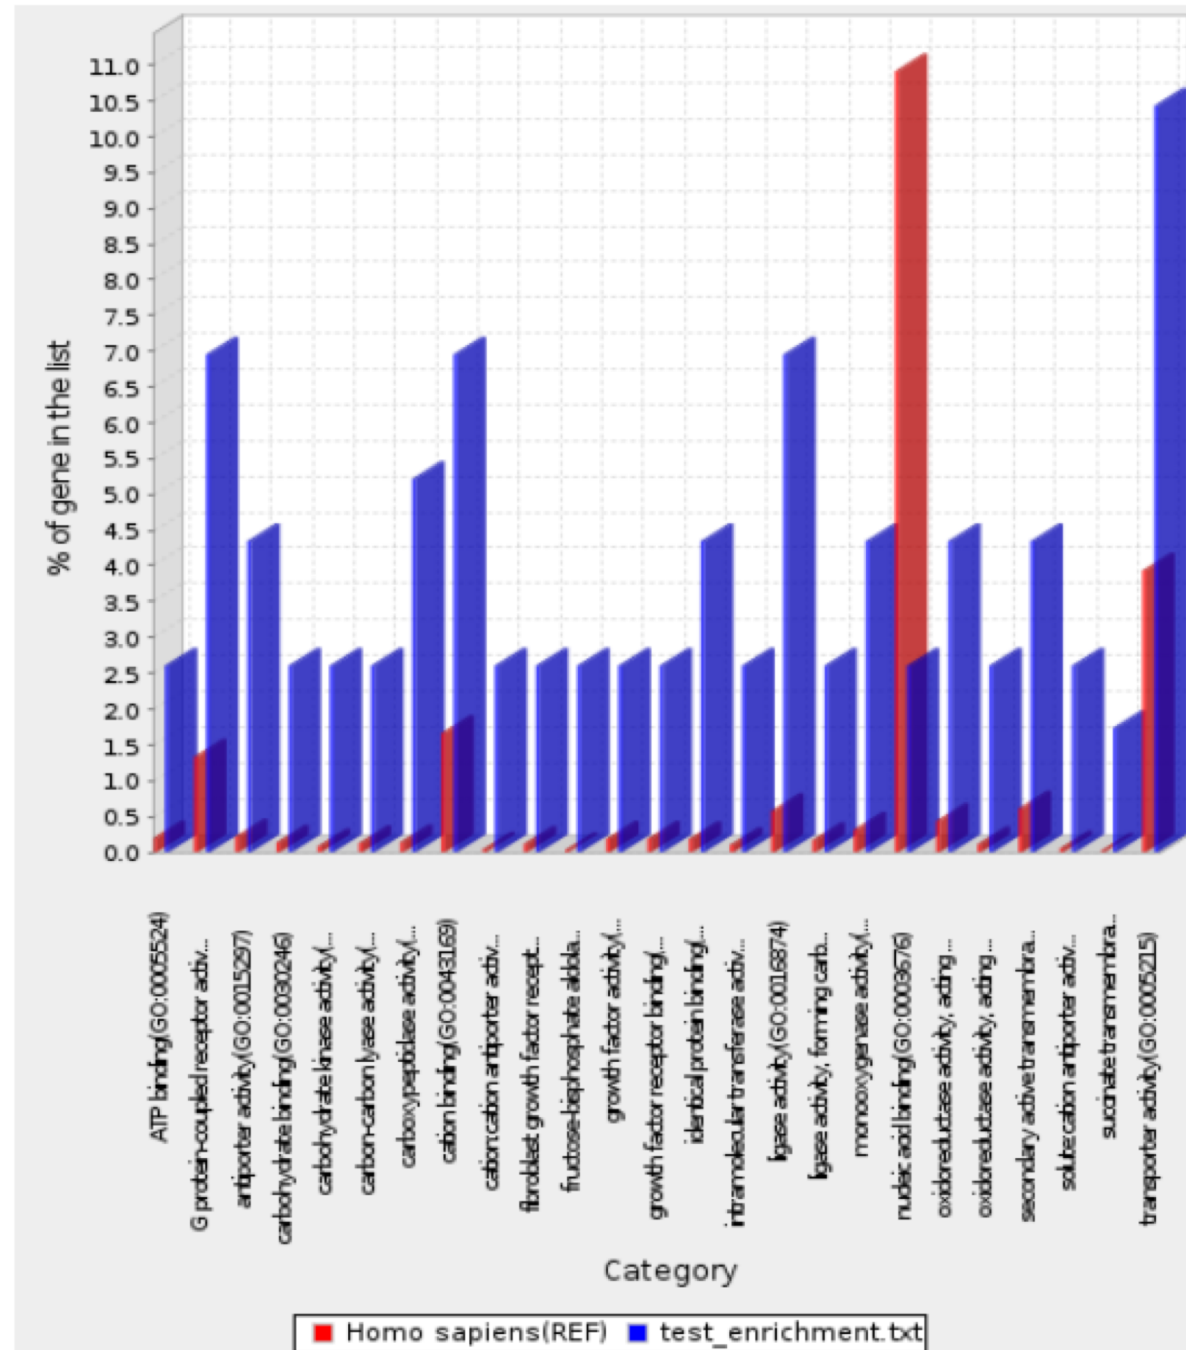

Fig. S10. Results of Statistical Overrepresentation of PANTHER GO-Slim Molecular Function terms.

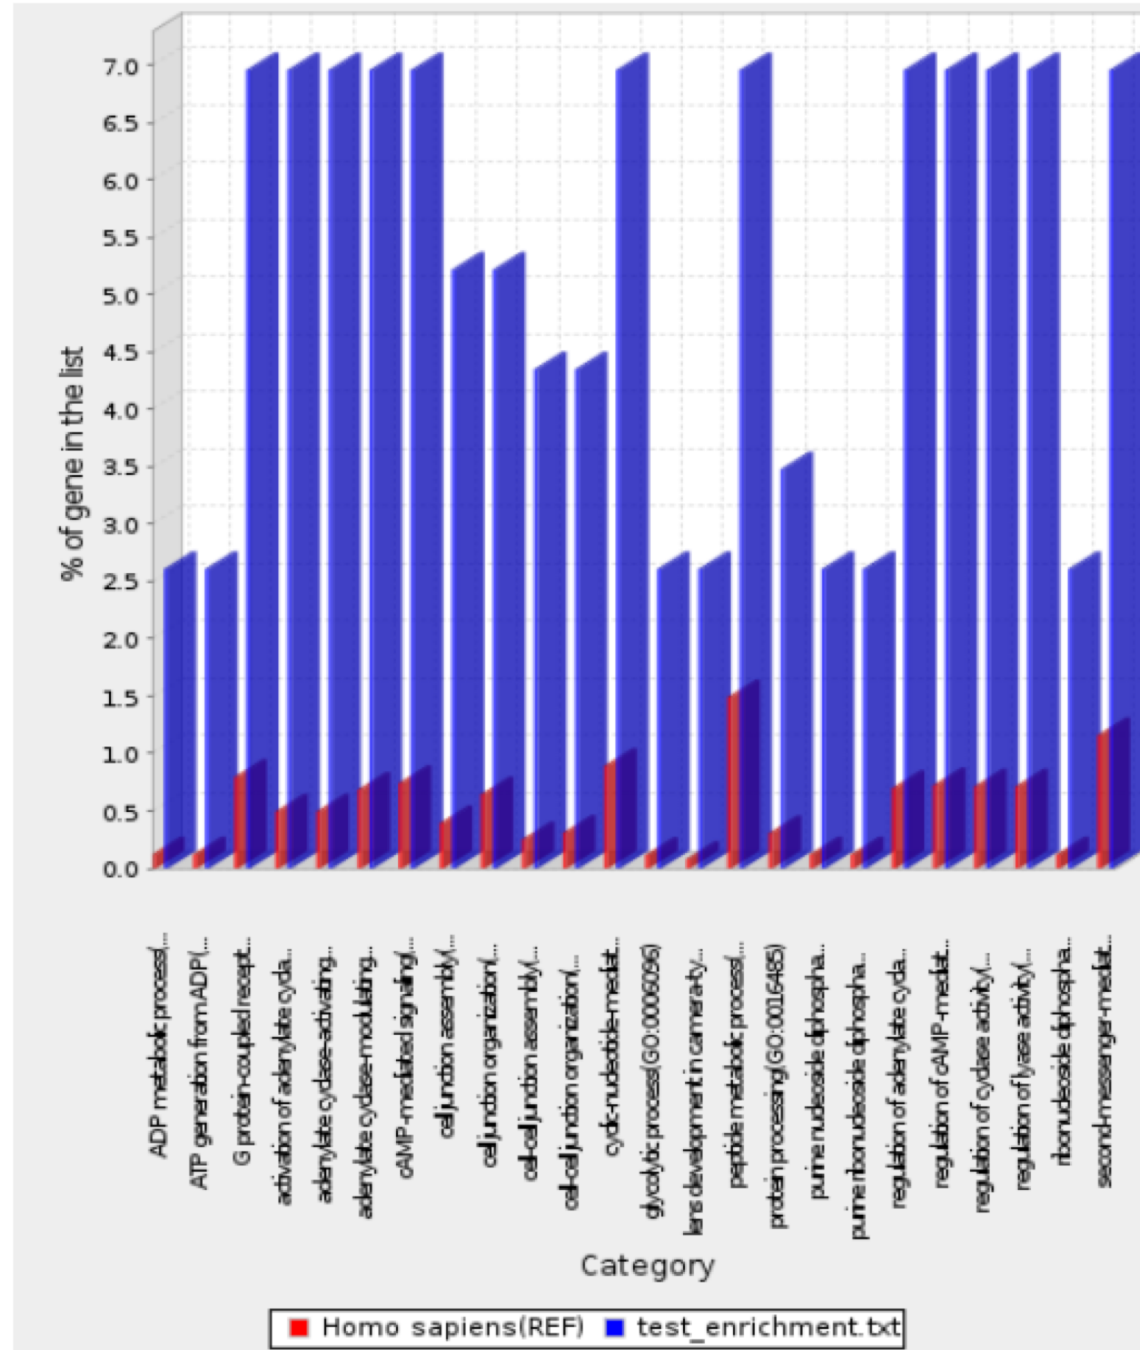

Fig. S11. Results of Statistical Overrepresentation of PANTHER GO-Slim Biological Process terms.

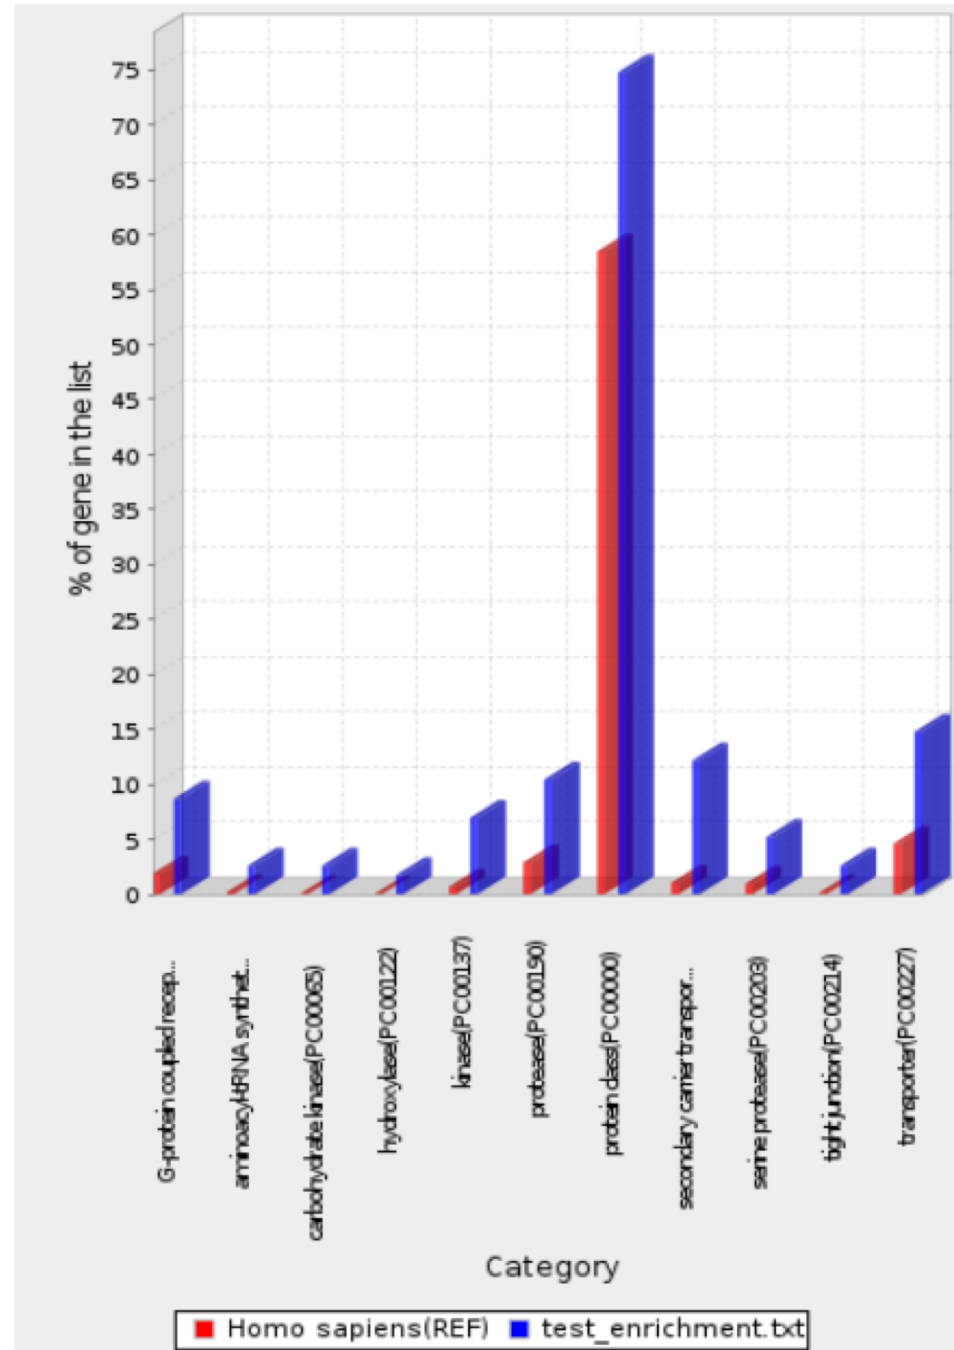

Fig. S12. Results of Statistical Overrepresentation PANTHER GO- Protein Class terms.

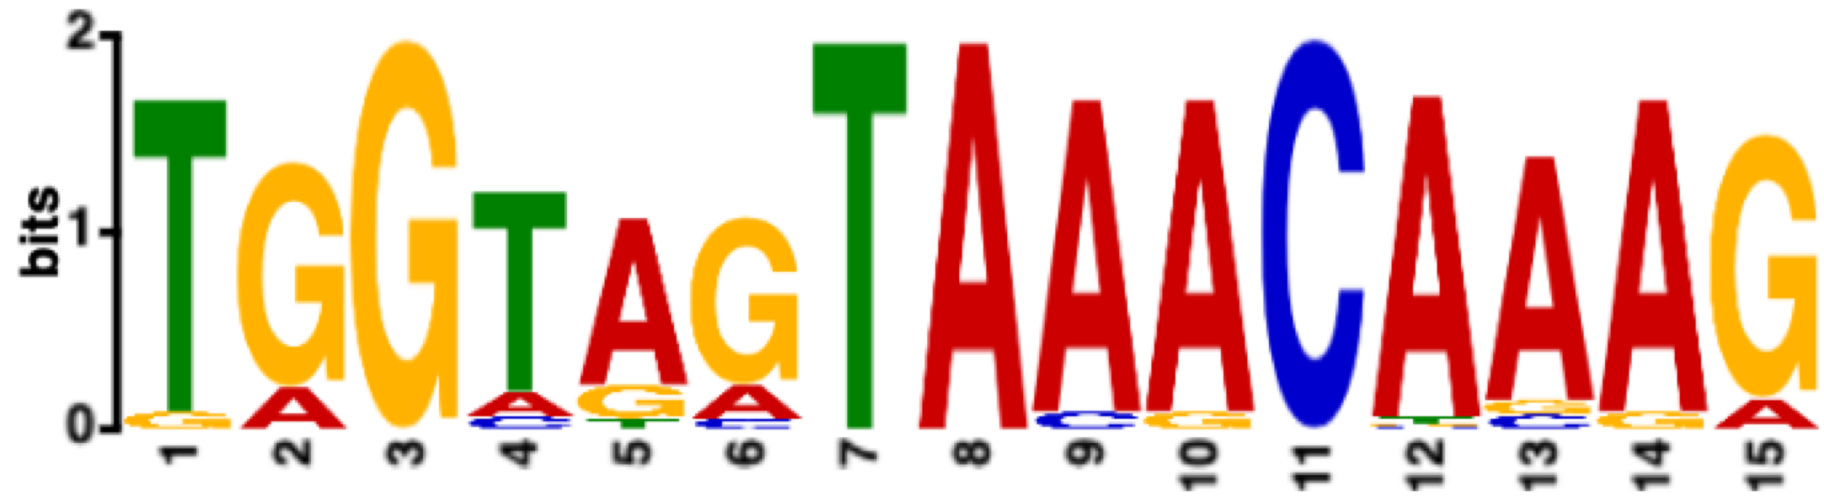

Fig. S13. Discovered motif from putative cis-regulatory regions of Novel Genes.

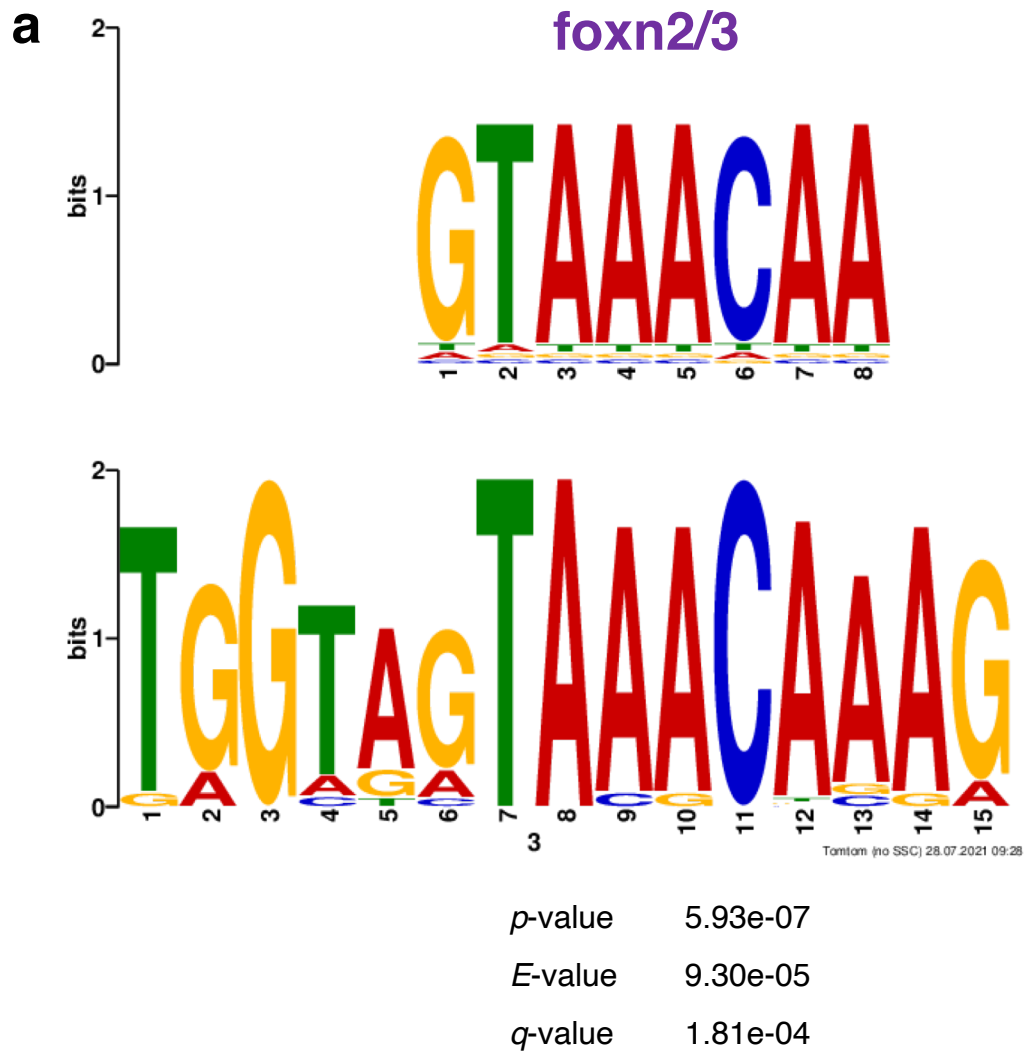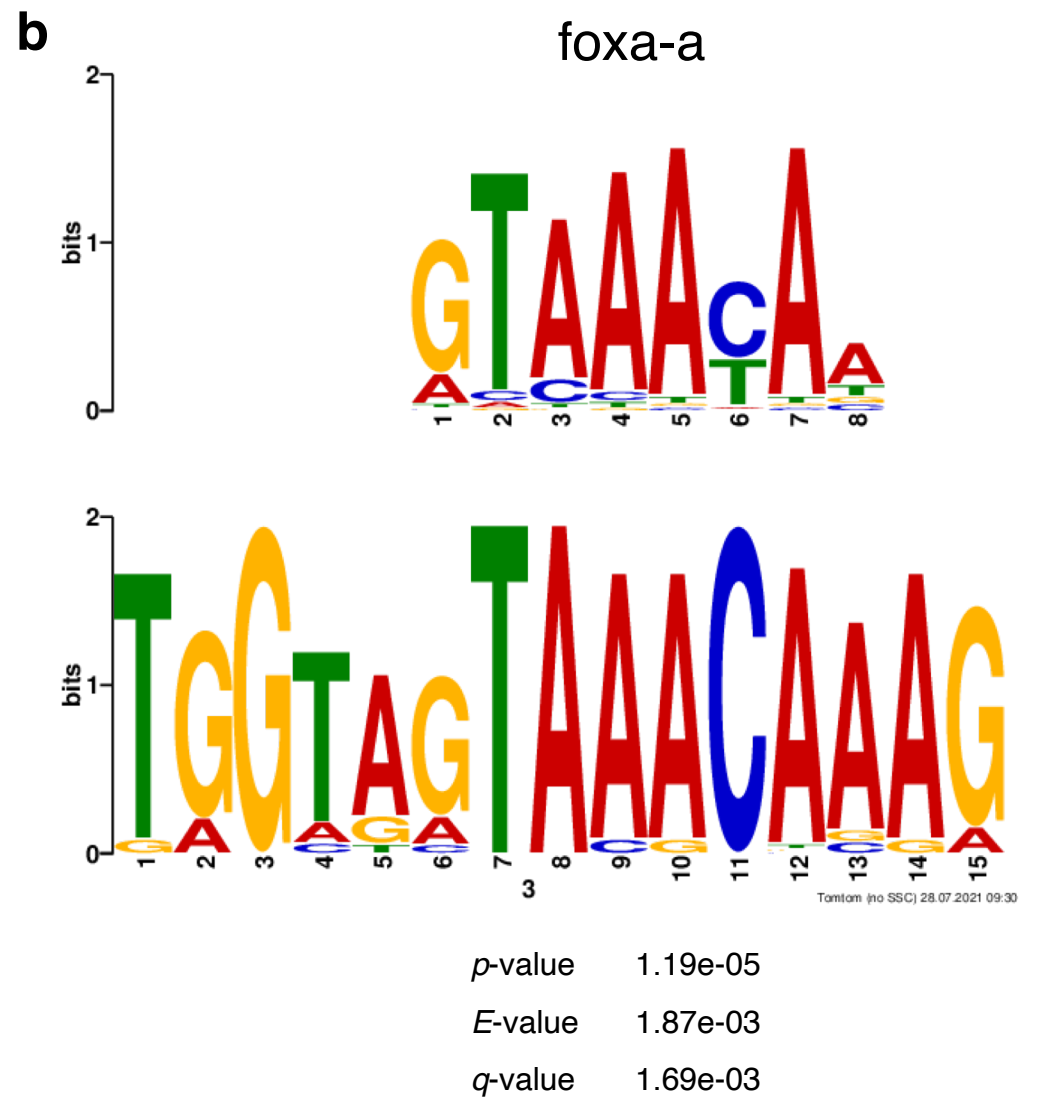

**Fig. S14a, b.** Matches (Transcription Factors in Ciona) to discovered motif and respective statistical significance.

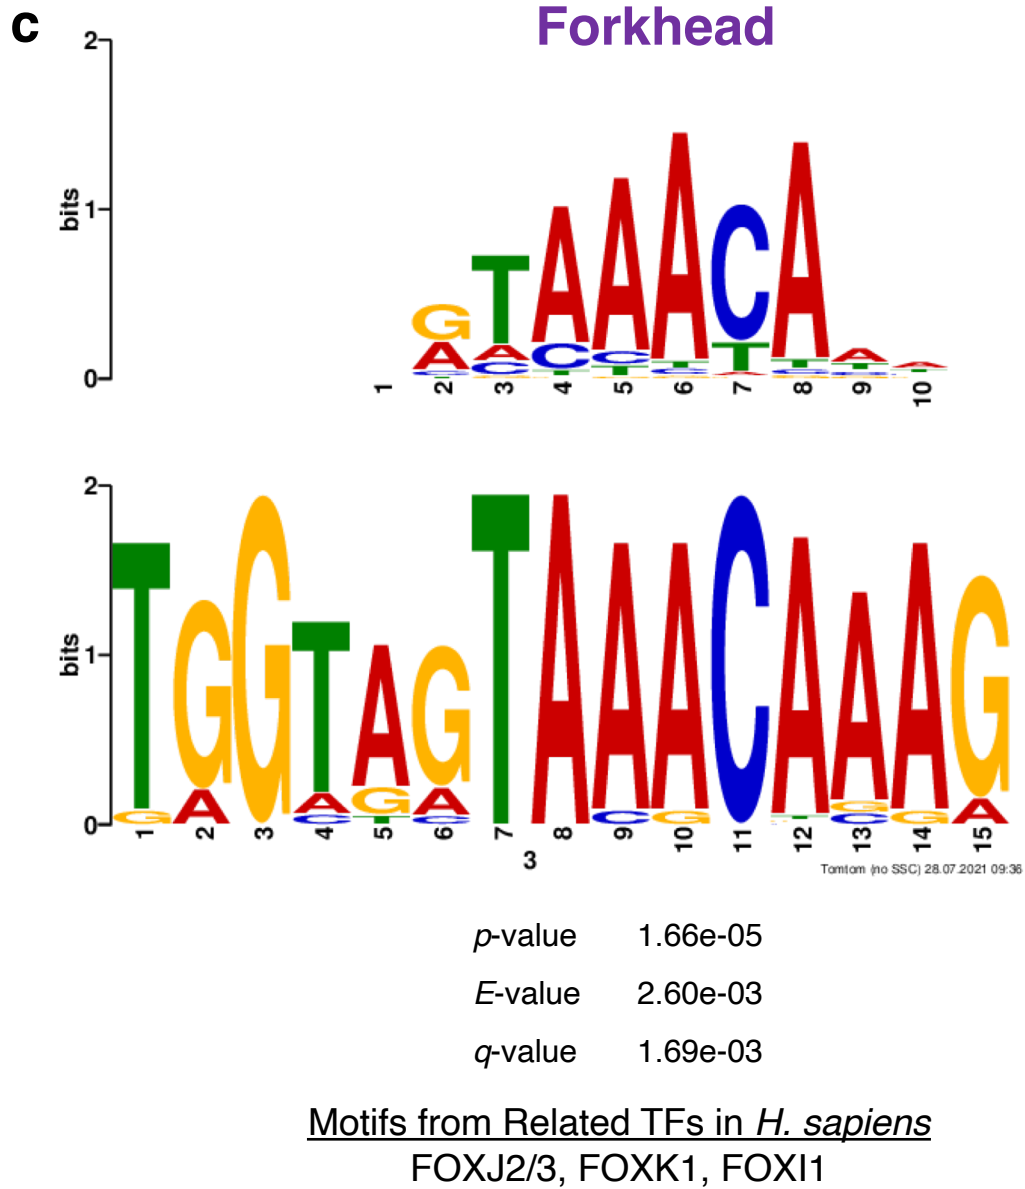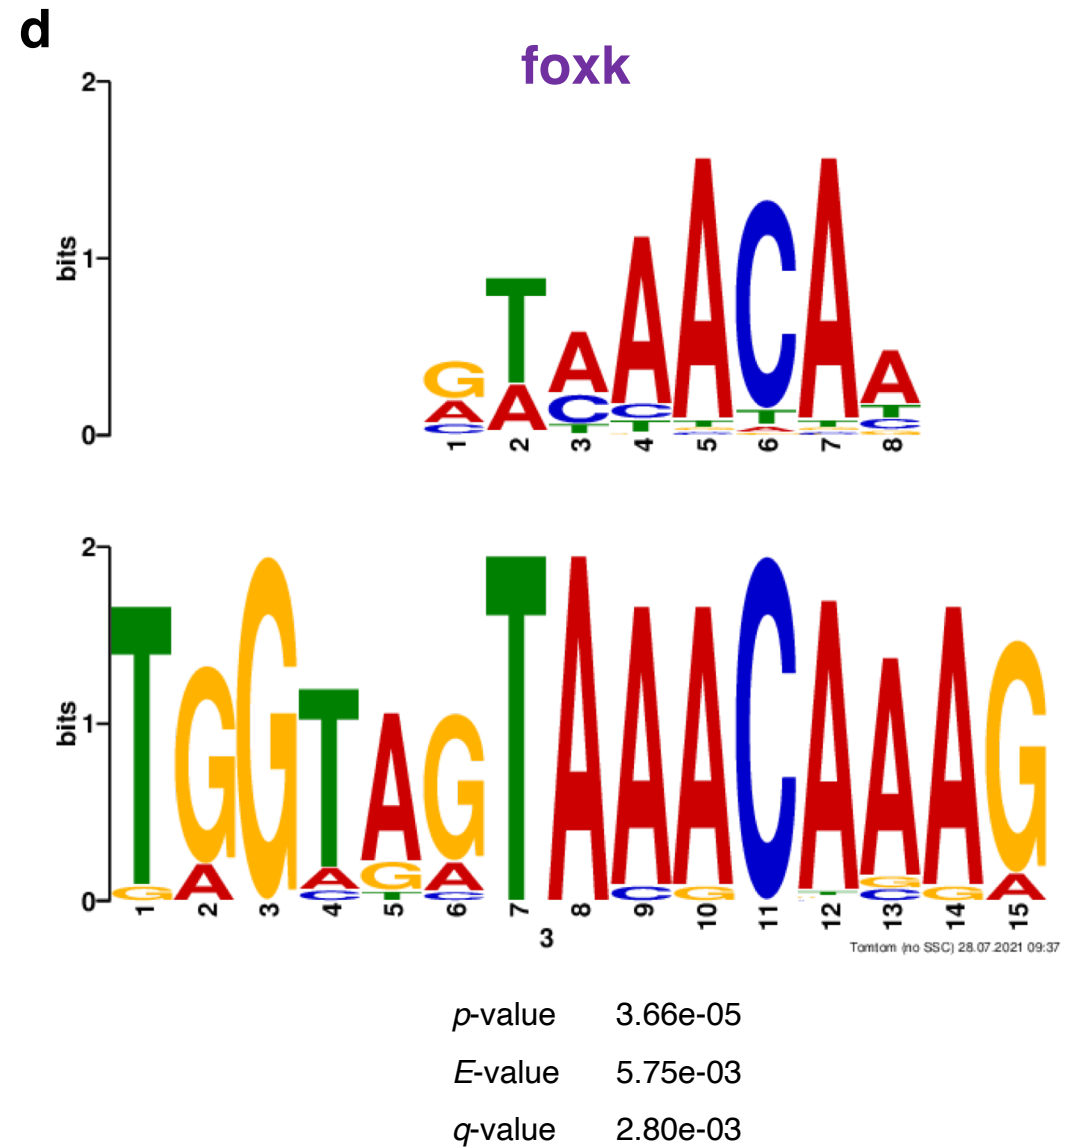

**Fig. S14c, d.** Match to discovered motif and respective statistical significance. Since there wasn't an exact match to a Transcription Factor in *Ciona*, similar matches in Human are reported.

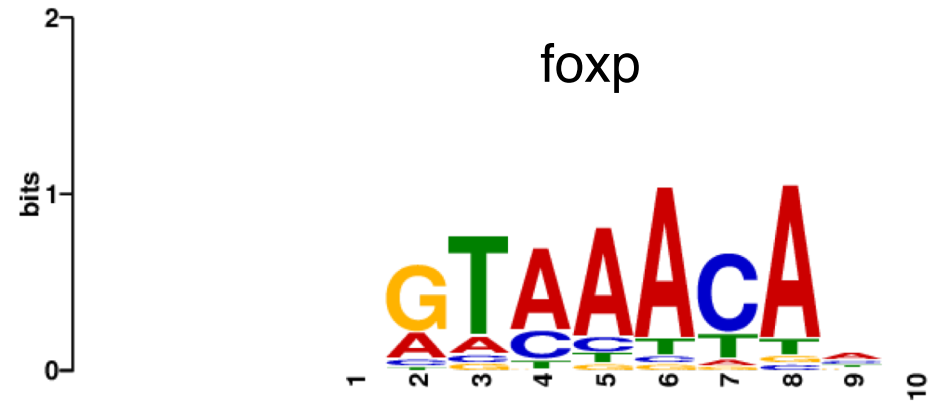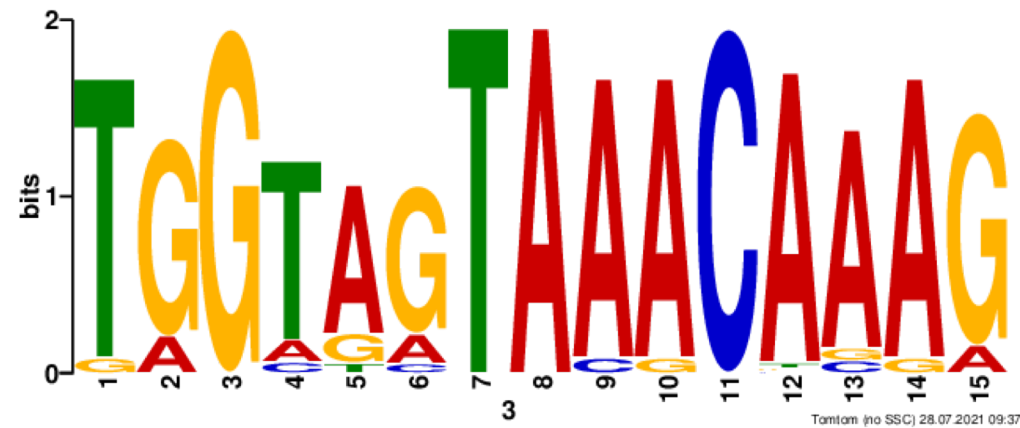

*p*-value 6.85e-04

*E*-value 1.08e-01

*q*-value 4.19e-02

**Fig. S14e.** Match (Transcription Factor in Ciona) to discovered motif and respective statistical significance.

**List S1. Forkhead TFs that are significantly more highly expressed in ME vs WT Epidermis**

They are in purple and bold font in Figs. S6a-e.

"FOXJ1" "FOXK1" "FOXK2" "FOX E3" "FOXI2" "FOXI3" "FOXF1" "FOXF2" "FOXL1" "FOXA2" "FOXB1"  
"FOXB2" "FOXK1" "FOXK2" "FOXD1" "FOXD3" "FOXD4" "FOXI1" "FOXI2" "FOXI3" "FOXG1" "FOXI1"  
"FOXI2" "FOXF1" "FOXH1" "FOXQ1" "FOXI3" "FOXJ2" "FOXJ3" "FOXN1" "FOXN2" "FOXN3"  
"FOXO1" "FOXO3" "FOXO4" "FOXF1" "FOXH1" "FOXQ1" "FOXF1" "FOXF2" "FOXQ1"



Estimated Number of Cells

5,078

Post-Normalization Mean  
Reads per Cell

25,721

Median Genes per Cell

1,163

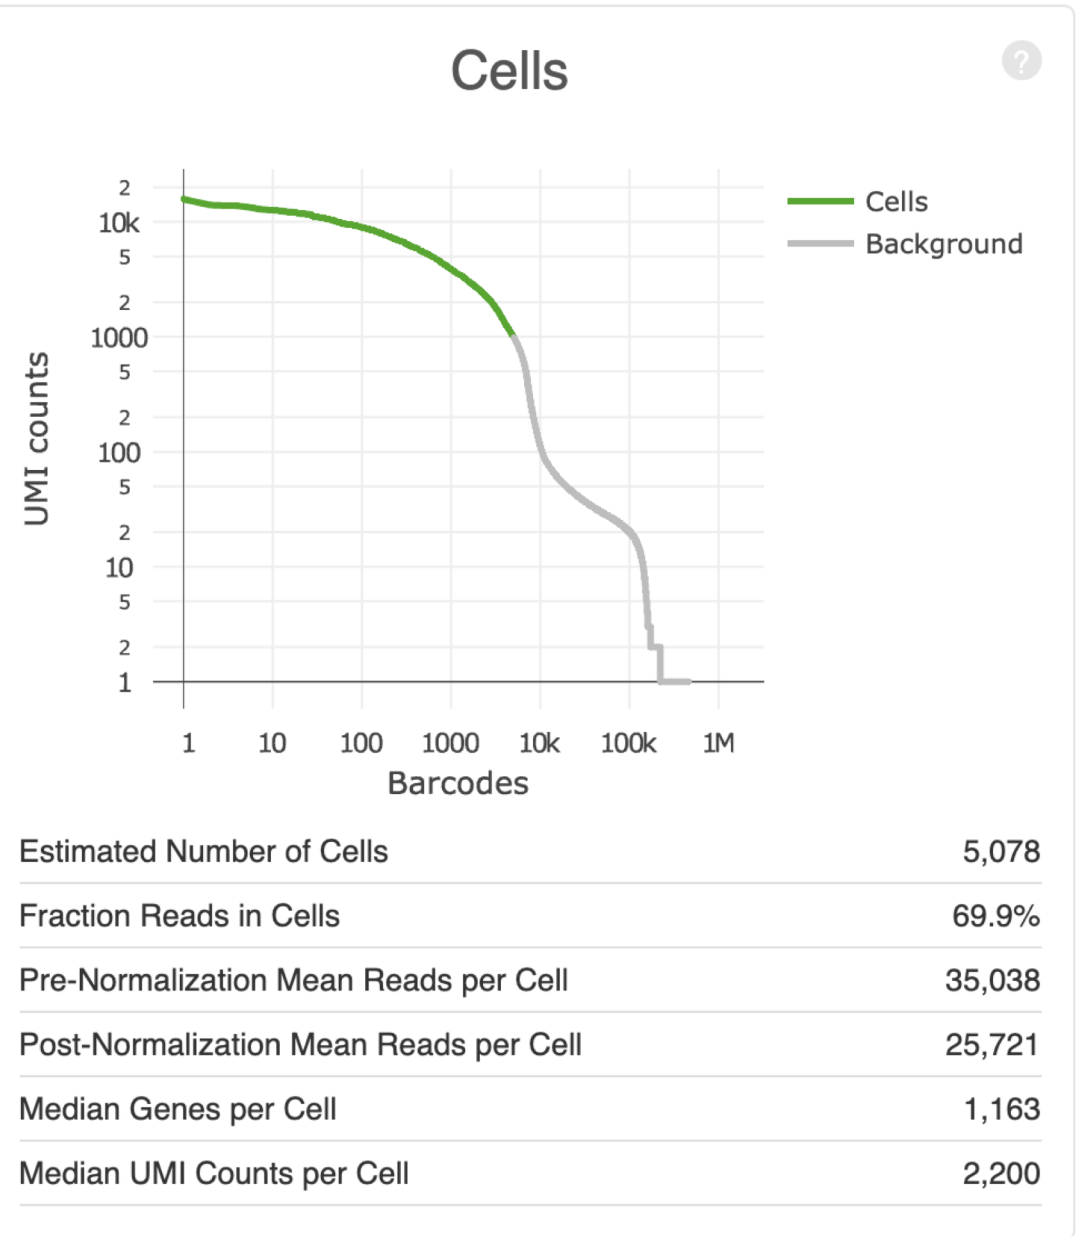

**Fig. S15. 10X Cell Ranger Summary Statistics of Single-cell Data Acquisition.** The expected number of cells of the *Ciona* tadpole at MTB stage is ~1600. These statistics demonstrate coverage of ~3x of the embryo.

### OE Epi Clusters

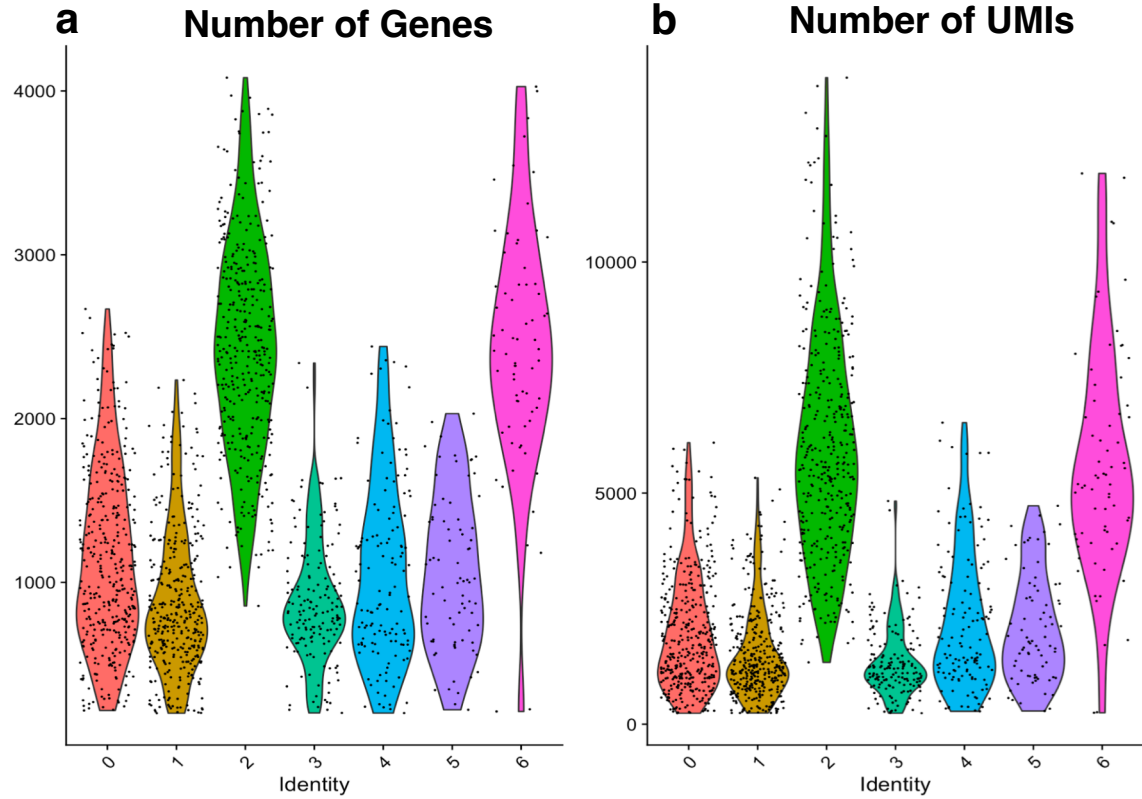

### WT Epi and CNS Clusters

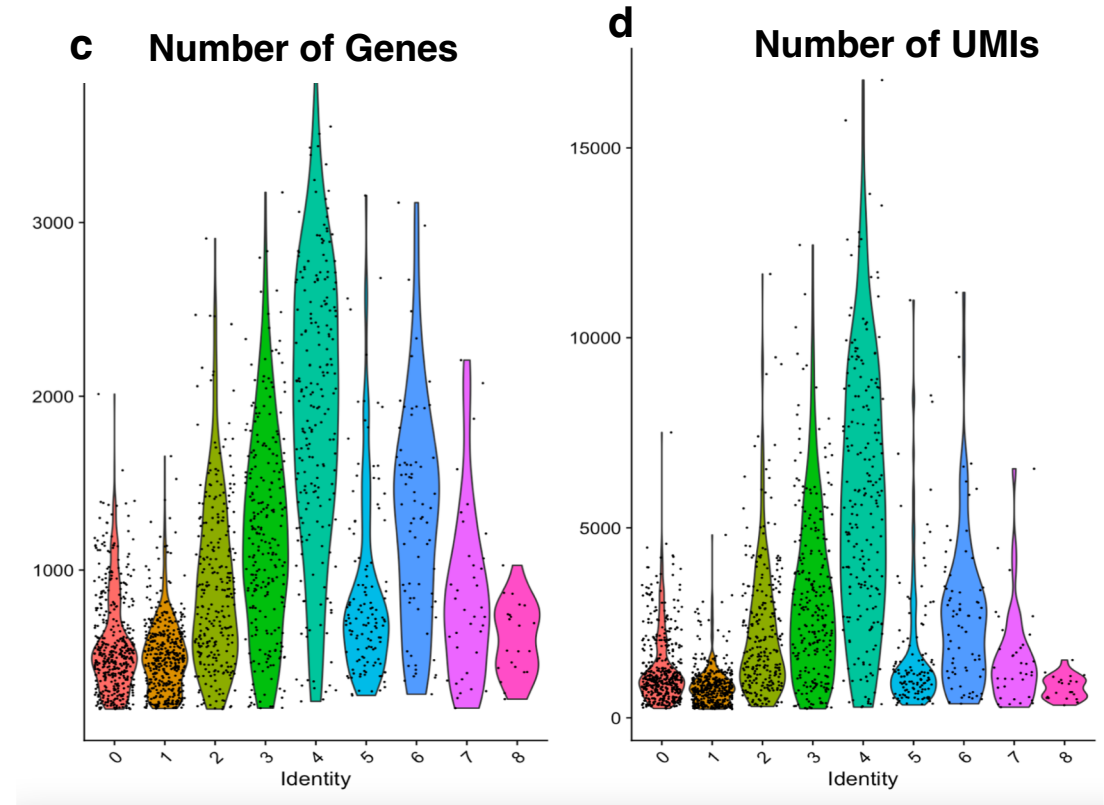

**Fig. S16. Number of Genes and UMIs in various OE Epi (a, b) and WT Epi and CNS (c, d) clusters.**  
Note: All Epidermal and Sensory Neuron types were identified from various Epi and CNS clusters.

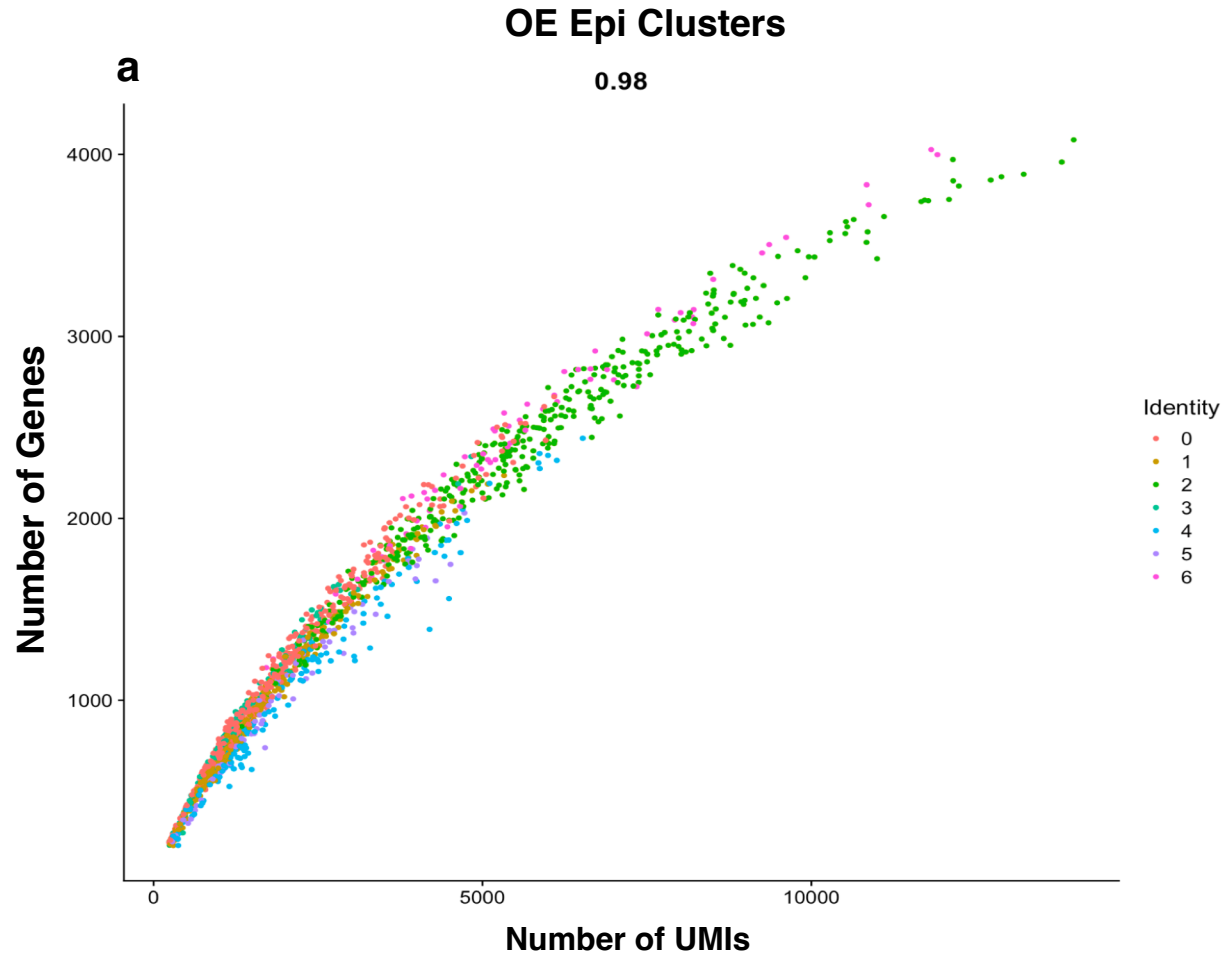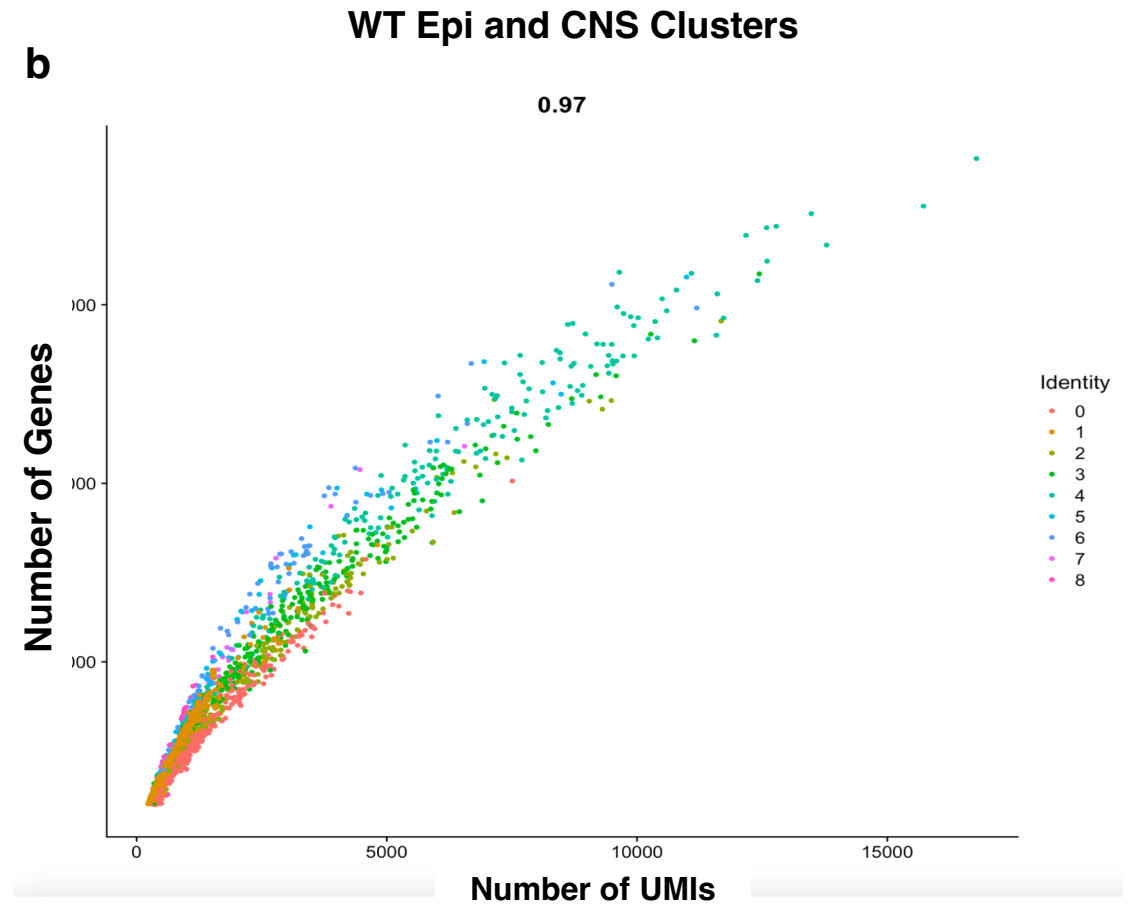

**Fig. S17. Scatterplot and Correlations of Number of Genes and Number of UMIs in OE Epi (a) and WT Epi and CNS (b) clusters.**

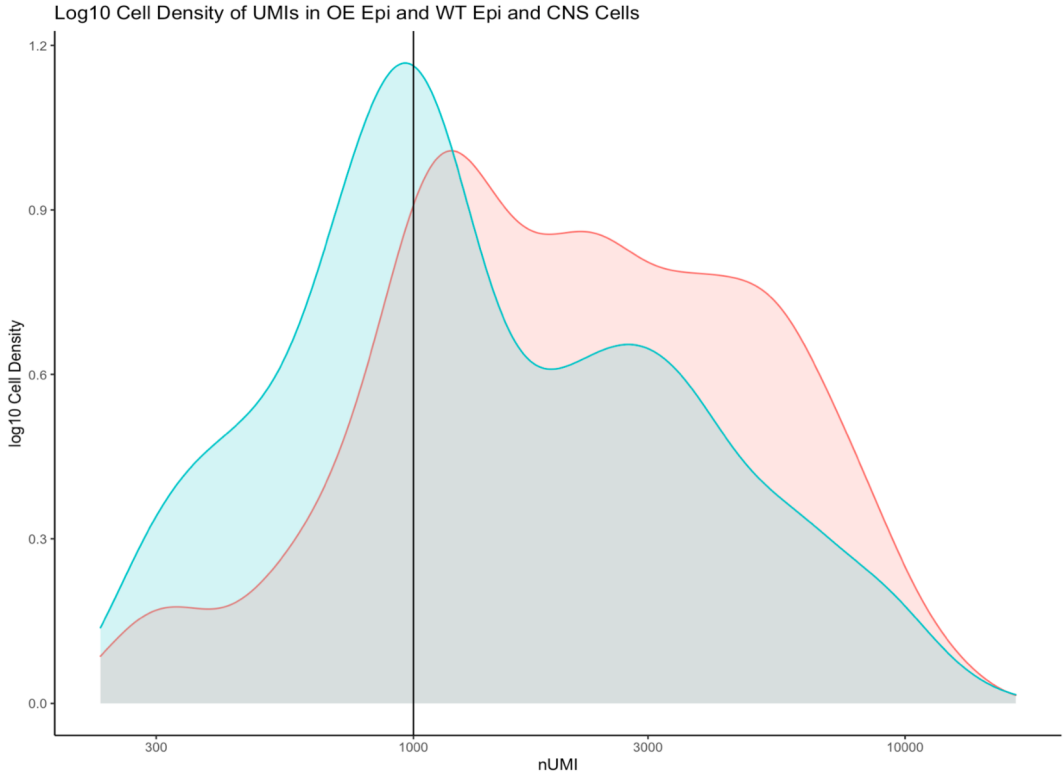

sample  
 OE Epi  
 WT Epi and CNS

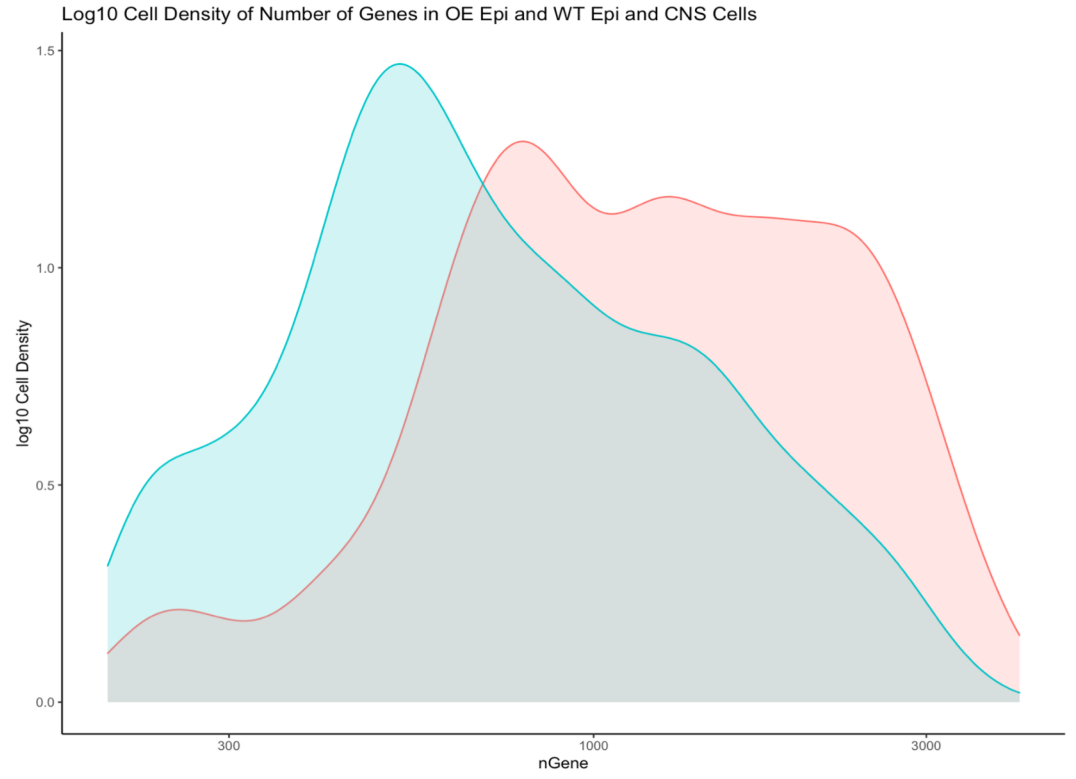

sample  
 OE Epi  
 WT Epi and CNS

**Fig. S18. Log10 Cell Density of UMIs (a) and Number of Genes (b) in OE Epi and WT Epi and CNS Cells. Vertical line is drawn at 1000 nUMIs to demonstrate high coverage of transcripts in both WT and OE cell populations.**

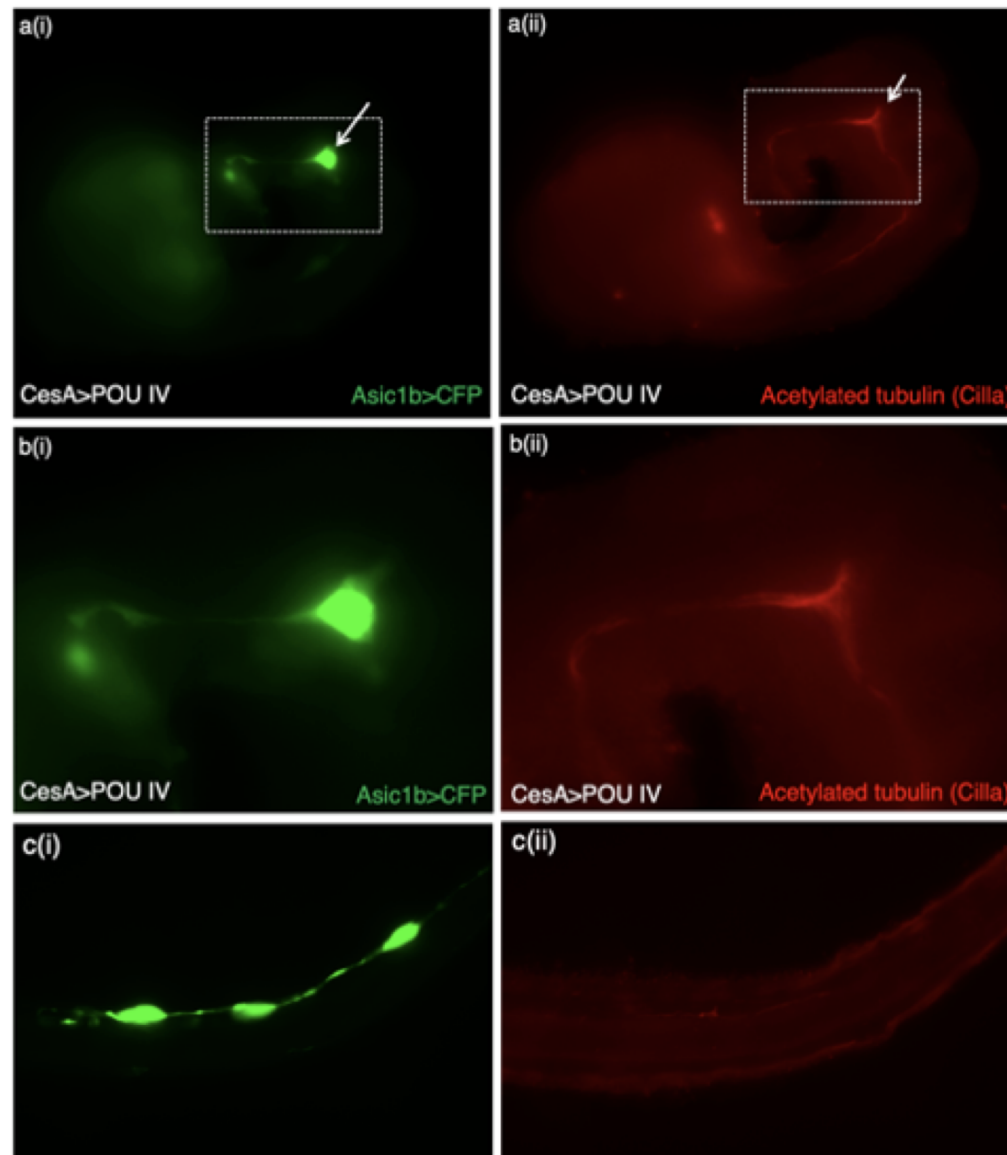

**Fig. S19. Misexpression of POU IV induces the differentiation of synthetic cell types, which have both properties of BTNs and PSCs (ai-ii)** CFP fluorescence (green) and acetylated tubulin immunofluorescence (red) in the *CesA>POU IV* and *Asic1b>CFP* injected larvae. A BTN marker gene, *Asic1b* is expressed in the PSCs in *CesA>POU IV* misexpressed larvae. **(bi-ii)** are zoomed-in images of (ai-ii). This cell shows hybrid properties of BTNs (has long axons) and PSCs (has cilia). **(c)** BTNs do not have cilia.
